# Supplementary material for: A case for myoglobin-macromolecular rate theory applied to pseudo peroxidase kinetics
Source: PeerJ. 2025 Apr 2;13:e19205. doi: 10.7717/peerj.19205 (PMC11971986; doi:10.7717/peerj.19205)
Supplement: Supplemental Information 1 [file peerj-13-19205-s001.xlsx]

## Sheet: CuSO4 data for MM fits
					CuSO4	TEMP	LNKCAT																																					CuSO4 (M)			(m0*m1)/(m2+m0);m1=3500;m2=500	775	841.667
										CuSO4 (M)			(m0*m1)/(m2+m0);m1=3500;m2=500	766.667	833.333	866.667	883.333	891.667	895.833		25 degC	0.102667	0	0.237316	0.00386205																			0.0133
				64		62	-9.14719			0.0133													1.53485	0.244254																							Water	2325	2525
				64		60	-9.36178						Water	2300	2500	2600	2650	2675	2687.5				3.06971	0.249215																							Buffer	100	100
				64		54	-9.28017						Buffer	100	100	100	100	100	100				4.60456	0.25638																							ABTS	75	75
				62		58	-9.4218						ABTS	100	100	100	100	100	100				6.13941	0.262339																							H2O2	400	200
				62		60	-8.72699						H2O2	400	200	100	50	25	12.5				7.67427	0.269824																							CuSO4	100	100
				62		64	-9.10442						CuSO4	100	100	100	100	100	100				9.20912	0.275187
				62		54	-9.3127																10.744	0.282007
				60		54	-9.28017																12.2788	0.286816																				Vmax	[H2O2] mM	Rate (M/sec)	Rate (A 730/sec)
				60		64	-9.1547			Vmax	[H2O2] mM	Rate (M/sec)	Rate (A 730/sec)										13.8137	0.292677																				4.2895e-07	1.03	3.39448e-07	0.00509172
				60		62	-9.06881			3.3882e-07	1.03	2.5747e-07	0.00386205										15.3485	0.298837																				Kcat	0.515	3.04034e-07	0.00456052
				60		60	-9.53918			Kcat	0.515	2.56333e-07	0.003845										16.8834	0.302479																				3.22519e-05	0.2575	2.09002e-07	0.00313503
				60		60	-9.33527			2.54752e-05	0.2575	2.01398e-07	0.00302097										18.4182	0.309063																				ln Kcat	0.12875	1.31303e-07	0.00196954
				58		58	-9.51744			ln Kcat	0.12875	1.189e-07	0.0017835										19.9531	0.314097																				-10.3419	0.064375	9.75498e-08	0.00146325
				58		56	-9.27735			-10.5778	0.064375	5.39184e-08	0.000808776																																0.0321875	6.05788e-08	0.000908682
				58		54	-9.62733				0.0321875	2.48389e-08	0.000372584									0.0513333	0	0.230179	0.003845																				0	0
				56		52	-9.51441				0	0											1.53485	0.236622
				56		50	-9.24258																3.06971	0.243682
				54		50	-9.34185																4.60456	0.249371
				54		48	-9.24507																6.13941	0.255152
				54		48	-9.39107																7.67427	0.260863
				54		46	-9.37543																9.20912	0.268092
				52		46	-9.16809																10.744	0.275357
				52		46	-9.37543																12.2788	0.279666
				52		44	-9.46392																13.8137	0.28579
				50		44	-9.54974																15.3485	0.290412
				50		44	-9.21057																16.8834	0.296501
				48		44	-9.14867																18.4182	0.301629
				48		44	-9.63399																19.9531	0.306379
				46		42	-9.52852															0.0256667	0	0.20917	0.00302097
				46		42	-9.45957																1.53485	0.212664
				46		40	-9.40358																3.06971	0.217001
				44		38	-9.79063																4.60456	0.222472
				44		36	-9.95053																6.13941	0.225469
				44		34	-10.0812																7.67427	0.229876
				44		32	-10.0373																9.20912	0.236282
				44		30	-10.2368																10.744	0.240567
				42		30	-10.3419																12.2788	0.245064
				42		28	-10.3361																13.8137	0.252807
				40		26	-10.3575																15.3485	0.25704
				40		25	-10.3485																16.8834	0.257567
				40		25	-10.5778																18.4182	0.264503
				38		22	-10.4081																19.9531	0.266545
				36		20	-10.8187
				34		52	-9.28826															0.0128333	0	0.198861	0.0017835
				32		52	-9.09621																1.53485	0.200572
				30		56	-9.06328																3.06971	0.201954
				30		40	-9.4245																4.60456	0.204617
				28		40	-9.48024																6.13941	0.207376
				26		58	-9.18268																7.67427	0.210463
				25		60	-9.05978																9.20912	0.214978
				25		62	-9.09279																10.744	0.215839
				22		64	-9.28445																12.2788	0.221324
				20		62	-9.3193																13.8137	0.222119
																							15.3485	0.223843
																							16.8834	0.227124
																							18.4182	0.231128
																							19.9531	0.232795
																						0.00641667	0	0.172014	0.000808776
																							1.53485	0.172552
																							3.06971	0.174806
																							4.60456	0.175841
																							6.13941	0.177529
																							7.67427	0.180738
																							9.20912	0.179789
																							10.744	0.180918
																							12.2788	0.18232
																							13.8137	0.182407
																							15.3485	0.184122
																							16.8834	0.185402
																							18.4182	0.186866
																							19.9531	0.189227
																						0.00320833	0	0.186437	0.000372584
																							1.53485	0.186973
																							3.06971	0.186782
																							4.60456	0.186432
																							6.13941	0.190161
																							7.67427	0.187293
																							9.20912	0.188688
																							10.744	0.188698
																							12.2788	0.191149
																							13.8137	0.190923
																							15.3485	0.191342
																							16.8834	0.191609
																							18.4182	0.193721
																							19.9531	0.193573
[truncated: 509 more columns]

## Sheet: MYO pH 5 data for MM fits
									MYO		Initials	(m0*m1)/(m2+m0);m1=3500;m2=500	758.333	825	858.333	875	883.333	887.5		23 degC	1.02667	0	0.123226	0.000468298		MYO		Initials	(m0*m1)/(m2+m0);m1=3500;m2=500	758.333	825	858.333	875	883.333	887.5		23 degC	10.2667	0	0.170672	0.00494348		MYO		Initials	(m0*m1)/(m2+m0);m1=3500;m2=500	758.333	825	858.333
			23	5.24765		880mM H2O2			1.67e-08		AH											1.74742	0.122452			1.67e-08		AH											1.70816	0.18103			1.67e-08		AH
			26	4.96322		.25mM MYO						Water	2275	2475	2575	2625	2650	2662.5				3.49484	0.123473						Water	2275	2475	2575	2625	2650	2662.5				3.41632	0.190035						Water	2275	2475	2575
			28	5.30518								Buffer	100	100	100	100	100	100				5.24226	0.125035						Buffer	100	100	100	100	100	100				5.12448	0.20069						Buffer	100	100	100
			30	4.71203								ABTS	100	100	100	100	100	100				6.98968	0.125444						ABTS	100	100	100	100	100	100				6.83264	0.208175						ABTS	100	100	100
			32	4.28816								H2O2	400	200	100	50	25	12.5				8.7371	0.125114						H2O2	400	200	100	50	25	12.5				8.5408	0.217199						H2O2	400	200	100
			32	4.63855								MgSO4	100	100	100	100	100	100				10.4845	0.127312						MgSO4	100	100	100	100	100	100				10.249	0.226425						MgSO4	100	100	100
			32	5.01359								MYO	25	25	25	25	25	25				12.2319	0.130316						MYO	25	25	25	25	25	25				11.9571	0.235259						MYO	25	25	25
			32	4.72088																		13.9794	0.129584																13.6653	0.242675
			34	4.76579					Vmax	[H2O2] mM	Rate (M/sec)	Rate (A 730/sec)										15.7268	0.128296			Vmax	[H2O2] mM	Rate (M/sec)	Rate (A 730/sec)										15.3734	0.250856			Vmax	[H2O2] mM	Rate (M/sec)	Rate (A 730/sec)
			36	3.82452						1.02667	3.12199e-08	0.000468298			run with 7.7 mM							17.4742	0.130517				10.2667	3.29565e-07	0.00494348				run with 77 mM						17.0816	0.256141				117.33	2.41192e-06	0.0361788
			36	3.44848					Kcat	0.513333	2.24965e-08	0.000337447										19.2216	0.131239			Kcat	5.13333	2.07458e-07	0.00311187										18.7898	0.262754			Kcat	58.665	1.43052e-06	0.0214578
			20	5.45793					0	0.256667	1.30555e-08	0.000195833														0	2.56667	1.03938e-07	0.00155908														0	29.3325	1.18047e-06	0.0177071
			18	5.16953					ln Kcat	0.128333	2.3151e-09	3.47265e-05									0.513333	0	0.0662466	0.000337447		ln Kcat	1.28333	5.74275e-08	0.000861412									5.13333	0	0.104626	0.00311187		ln Kcat	14.6662	5.70318e-07	0.00855477
			16	5.60081					#NUM!	0.0641667	2.6591e-09	3.98865e-05										1.74742	0.0664671			#NUM!	0.641667	2.84997e-08	0.000427495										1.70816	0.110191			#NUM!	7.33312	4.76353e-07	0.0071453
			20	5.20871	0.125					0.0320833	-1.49579e-08	-0.000224369										3.49484	0.0678916				0.320833	1.65571e-08	0.000248357										3.41632	0.115914				3.66656	2.03972e-07	0.00305959
			18	5.37633	0.125					0	0											5.24226	0.0681717				0	0											5.12448	0.121393				0	0
			35	3.23287																		6.98968	0.0683865																6.83264	0.126336
			20	5.20465																		8.7371	0.0687044																8.5408	0.133718
			20	5.18023																		10.4845	0.0698481																10.249	0.138301
			15	4.97267																		12.2319	0.0695654																11.9571	0.143655
			10	4.72399																		13.9794	0.0718361																13.6653	0.149095
			5	4.12093	0.5																	15.7268	0.0716577																15.3734	0.153681
			3	4.39621	0.5																	17.4742	0.0717934																17.0816	0.157739
			3	4.0283	0.5																	19.2216	0.0727322																18.7898	0.162162
																					0.256667	0	0.0793832	0.000195833														2.56667	0	0.0833799	0.00155908
																						1.74742	0.0793106																1.70816	0.086112
																						3.49484	0.0799035																3.41632	0.088284
																						5.24226	0.080832																5.12448	0.0917729
																						6.98968	0.0808516																6.83264	0.0946791
																						8.7371	0.0811655																8.5408	0.0991173
																						10.4845	0.0812327																10.249	0.101574
																						12.2319	0.0817807																11.9571	0.104123
																						13.9794	0.0823611																13.6653	0.10576
																						15.7268	0.0835283																15.3734	0.107999
																						17.4742	0.0823207																17.0816	0.109621
																						19.2216	0.0825564																18.7898	0.111685
																					0.128333	0	0.0631273	3.47265e-05														1.28333	0	0.0793286	0.000861412
																						1.74742	0.0625967																1.70816	0.081336
																						3.49484	0.0626232																3.41632	0.0815466
																						5.24226	0.0623529																5.12448	0.0840006
																						6.98968	0.0634825																6.83264	0.0851769
																						8.7371	0.0629848																8.5408	0.0876747
																						10.4845	0.0631642																10.249	0.0894469
																						12.2319	0.06314																11.9571	0.0903142
																						13.9794	0.0637125																13.6653	0.0915246
																						15.7268	0.0634483																15.3734	0.0920626
																						17.4742	0.0630719																17.0816	0.0942122
																						19.2216	0.0632503																18.7898	0.0953764
																					0.0641667	0	0.0663349	3.98865e-05														0.641667	0	0.0748954	0.000427495
																						1.74742	0.0665586																1.70816	0.0746636
																						3.49484	0.0667376																3.41632	0.0765346
																						5.24226	0.0680528																5.12448	0.0764054
																						6.98968	0.0668368																6.83264	0.0768893
																						8.7371	0.0669607																8.5408	0.0784851
																						10.4845	0.0670918																10.249	0.0787839
																						12.2319	0.0685674																11.9571	0.0794573
																						13.9794	0.0661771																13.6653	0.0810125
																						15.7268	0.0678257																15.3734	0.0807348
																						17.4742	0.0669341																17.0816	0.0814683
																						19.2216	0.0676994																18.7898	0.0828194
																					0.0320833	0	0.0739395	-0.000224369														0.320833	0	0.0722063	0.000248357
																						1.74742	0.0765391																1.70816	0.0714552
																						3.49484	0.0820531																3.41632	0.0731406
																						5.24226	0.075856																5.12448	0.0732858
																						6.98968	0.0723966																6.83264	0.0747933
																						8.7371	0.0740528																8.5408	0.0737977
																						10.4845	0.0730374																10.249	0.0747397
																						12.2319	0.0731166																11.9571	0.0756311
																						13.9794	0.073107																13.6653	0.0750232
																						15.7268	0.0733858																15.3734	0.0770366
																						17.4742	0.0730304																17.0816	0.0758221
																						19.2216	0.0732775																18.7898	0.0760803
[truncated: 442 more columns]

## Sheet: LPO pH 5 data for MM fits
											LPO		Initials	(m0*m1)/(m2+m0);m1=3500;m2=500	758.333	825	858.333	875	883.333	887.5		24 degC	0.102667	0	0.146106	0.0125855		LPO		Initials	(m0*m1)/(m2+m0);m1=3500;m2=500	758.333	825	858.333	875	883.333	887.5		40 degC	0.102667	0	0.337426	0.0237052		LPO		Initials	(m0*m1)/(m2+m0);m1=3500;m2=500	758.333
											4.3e-09	100	AH											1.75731	0.168911			4.3e-09	100	AH											1.75731	0.377572			4.3e-09	100	AH
											2.15e-09	50		Water	2275	2475	2575	2625	2650	2662.5				3.51463	0.188842			2.15e-09	50		Water	2275	2475	2575	2625	2650	2662.5				3.51463	0.416367			2.15e-09	50		Water	2275
			10	8.13454							1.075e-09	25		Buffer	100	100	100	100	100	100				5.27194	0.208209			1.075e-09	25		Buffer	100	100	100	100	100	100				5.27194	0.458045			1.075e-09	25		Buffer	100
	20	7.70702				20					5.375e-10	12.5		ABTS	100	100	100	100	100	100				7.02925	0.228709			5.375e-10	12.5		ABTS	100	100	100	100	100	100				7.02925	0.494999			5.375e-10	12.5		ABTS	100
	22	7.79014				22								H2O2	400	200	100	50	25	12.5				8.78657	0.252328						H2O2	400	200	100	50	25	12.5				8.78657	0.540615						H2O2	400
	26	8.06776				24								MgSO4	100	100	100	100	100	100				10.5439	0.274601						MgSO4	100	100	100	100	100	100				10.5439	0.584041						MgSO4	100
	28	8.18667				26								LPO	25	25	25	25	25	25				12.3012	0.298254						LPO	25	25	25	25	25	25				12.3012	0.626477						LPO	25
	30	8.31606				28																		14.0585	0.319913																14.0585	0.667488
	32	8.27066				30					Vmax	[H2O2] mM	Rate (M/sec)	Rate (A 730/sec)										15.8158	0.343132			Vmax	[H2O2] mM	Rate (M/sec)	Rate (A 730/sec)										15.8158	0.709543			Vmax	[H2O2] mM	Rate (M/sec)	Rate (A 730/sec)
	32	8.28667				32					3.4215e-06	0.102667	8.39033e-07	0.0125855										17.5731	0.365905				0.102667	1.58035e-06	0.0237052										17.5731	0.75062				1.02667	4.05878e-07	0.00608817
	42	8.60934				32					Kcat	0.0513333	4.69848e-07	0.00704772										19.3304	0.390011			Kcat	0.0513333	1.15201e-06	0.0172802										19.3304	0.793725			Kcat	0.513333	2.4156e-07	0.0036234
	34	8.55982				34					3182.79	0.0256667	2.62805e-07	0.00394207														0	0.0256667	4.88966e-07	0.00733449														0	0.256667	1.24247e-07	0.00186371
			36	8.22245		37					ln Kcat	0.0128333	1.34943e-07	0.00202414									0.0513333	0	0.101223	0.00704772		ln Kcat	0.0128333	3.26186e-07	0.00489278									0.0513333	0	0.312657	0.0172802		ln Kcat	0.128333	7.07032e-08	0.00106055
			38	7.91782		38					8.06551	0.00641667	7.24834e-08	0.00108725										1.75731	0.114921			#NUM!	0.00641667	2.52425e-07	0.00378637										1.75731	0.34042			#NUM!	0.0641667	3.88923e-08	0.000583385
			38	8.09818		39						0.00320833	2.80476e-08	0.000420714										3.51463	0.126427				0.00320833	5.07266e-08	0.000760899										3.51463	0.369344				0.0320833	5.63818e-09	8.45726e-05
	37	8.60801				40						0	0											5.27194	0.137712				0	0											5.27194	0.39759				0	0
	39	8.44952				42																		7.02925	0.149163																7.02925	0.425732
	40	8.56105				42																		8.78657	0.161772																8.78657	0.459208
	38	8.66287				42																		10.5439	0.174794																10.5439	0.489925
	24	8.08499				44																		12.3012	0.188202																12.3012	0.521033
	44	8.79262				44																		14.0585	0.200855																14.0585	0.551395
			44	8.96619		44																		15.8158	0.213177																15.8158	0.583149
			42	8.9359		46																		17.5731	0.224704																17.5731	0.613313
	46	8.69471				48																		19.3304	0.237676																19.3304	0.644162
	48	8.71314				48
	50	8.56365				50
	52	8.51087				50																	0.0256667	0	0.0832811	0.00394207														0.0256667	0	0.167817	0.00733449
	50	8.60881				52																		1.75731	0.0895618																1.75731	0.177073
	44	8.53743																						3.51463	0.095957																3.51463	0.189381
	42	8.69108																						5.27194	0.102204																5.27194	0.201647
	48	8.68086																						7.02925	0.109021																7.02925	0.212949
	46	8.53164																						8.78657	0.115494																8.78657	0.227912
	52	8.54853																						10.5439	0.123329																10.5439	0.242381
	60	8.3609																						12.3012	0.131349																12.3012	0.254305
																								14.0585	0.138336																14.0585	0.268316
																								15.8158	0.145472																15.8158	0.281431
																								17.5731	0.151575																17.5731	0.293544
																								19.3304	0.157921																19.3304	0.30616
																							0.0128333	0	0.0689263	0.00202414														0.0128333	0	0.145054	0.00489278
																								1.75731	0.0721637																1.75731	0.153639
																								3.51463	0.0758368																3.51463	0.161263
																								5.27194	0.0790788																5.27194	0.169308
																								7.02925	0.082209																7.02925	0.177446
																								8.78657	0.0867668																8.78657	0.186771
																								10.5439	0.0893778																10.5439	0.195376
																								12.3012	0.0936479																12.3012	0.20572
																								14.0585	0.0976363																14.0585	0.216101
																								15.8158	0.100416																15.8158	0.222616
																								17.5731	0.104673																17.5731	0.231449
																								19.3304	0.107377																19.3304	0.236137
																							0.00641667	0	0.0602171	0.00108725														0.00641667	0	0.137856	0.00378637
																								1.75731	0.062323																1.75731	0.143944
																								3.51463	0.0637611																3.51463	0.149924
																								5.27194	0.0650924																5.27194	0.157034
																								7.02925	0.0679266																7.02925	0.163737
																								8.78657	0.0696998																8.78657	0.171662
																								10.5439	0.0720354																10.5439	0.177763
																								12.3012	0.0735654																12.3012	0.184616
																								14.0585	0.0757958																14.0585	0.190415
																								15.8158	0.0769687																15.8158	0.197927
																								17.5731	0.0791029																17.5731	0.202922
																								19.3304	0.0816351																19.3304	0.210361
																							0.00320833	0	0.0553405	0.000420714														0.00320833	0	0.0901531	0.000760899
																								1.75731	0.0554402																1.75731	0.0913914
																								3.51463	0.0574608																3.51463	0.0940116
																								5.27194	0.057911																5.27194	0.0951943
																								7.02925	0.0569931																7.02925	0.0948657
																								8.78657	0.0579361																8.78657	0.096245
																								10.5439	0.0592467																10.5439	0.10001
																								12.3012	0.0601085																12.3012	0.0995734
																								14.0585	0.0607936																14.0585	0.100349
																								15.8158	0.0619685																15.8158	0.101826
																								17.5731	0.0628608																17.5731	0.10456
																								19.3304	0.063344																19.3304	0.105202
[truncated: 458 more columns]

## Sheet: Calc sheet
Hemo pH 7		MM							HEMO		Initials	(m0*m1)/(m2+m0);m1=0.000000045;m2=0.3	760	813.333	840	853.333	860	863.51		4 degC	1.08053	150	0.136193	0.000624971		HEMO		Initials	(m0*m1)/(m2+m0);m1=0.000000045;m2=0.3	760	813.333	840	853.333	860	863.51		21 degC	1.08053	30	0.121668	0.00178101		HEMO		Initials	(m0*m1)/(m2+m0);m1=0.000000045;m2=0.3	760	813.333	840
		(m0*m1)/(m2+m0);m1=3500;m2=500							5.16033e-09		AH											152	0.137024			5.16033e-09		AH											32	0.126989			5.16033e-09		AH
												Water	2280	2440	2520	2560	2580	2590.53				154	0.137977						Water	2280	2440	2520	2560	2580	2590.53				34	0.129891						Water	2280	2440	2520
												Buffer	100	100	100	100	100	100				156	0.139103						Buffer	100	100	100	100	100	100				36	0.133022						Buffer	100	100	100
		MMRT Eq										ABTS	100	100	100	100	100	100				158	0.140821						ABTS	100	100	100	100	100	100				38	0.136284						ABTS	100	100	100
												H2O2	320	160	80	40	20	9.47				160	0.142021						H2O2	320	160	80	40	20	9.47				40	0.142231						H2O2	320	160	80
	Fit 1st and find Topt	ln(131000000000*M0)-((M1+(M2*(M0-315)))/(8.314*M0))+((M3+M2*ln(M0/315))/8.314); m1=-2500; m2=100; m3=200										MgSO4	100	100	100	100	100	100				162	0.145335						MgSO4	100	100	100	100	100	100				42	0.144934						MgSO4	100	100	100
	Fit 2nd using Topt to find delH	ln(131000000000*M0)-((M1+(M2*(M0-303)))/(8.314*M0))+((M3+M2*ln(M0/303))/8.314); m1=20000; m2=100; m3=200										HEMO	100	100	100	100	100	100				164	0.145034						HEMO	100	100	100	100	100	100				44	0.147851						HEMO	100	100	100
	Fit 3rd using Top del H and Topt to find del Hcp	ln(131000000000*M0)-(((-2519)+(M1*(M0-303)))/(8.314*M0))+((M2+M1*ln(M0/303))/8.314); m1=-1290; m2=-500																				166	0.145641																46	0.149628
		ln(131000000000*M0)-((M1+(-2519))*(M0-303))/(8.314*M0))+(((-197.26)+(-2519)*ln(M0/303))/8.314); m1=-2648							Vmax	[H2O2] mM	Rate (M/sec)	Rate (A 730/sec)										168	0.147026			Vmax	[H2O2] mM	Rate (M/sec)	Rate (A 730/sec)														Vmax	[H2O2] mM	Rate (M/sec)	Rate (A 730/sec)
									5.3198e-08	1.08053	4.16647e-08	0.000624971			run with 7.7 mM							170	0.148143			1.8002e-07	1.08053	1.18734e-07	0.00178101			run with 7.7 mM											1.8797e-07	1.08053	1.45376e-07	0.00218065			run with 7.7 mM
		ln(131000000000*M0)-(((-2826)+(M1*(M0-M3)))/(8.314*M0))+((M2+M1*ln(M0/M3))/8.314); m1=-1290; m2=-500; m3=301							Kcat	0.540267	3.36188e-08	0.000504282										172	0.149413			Kcat	0.540267	1.06636e-07	0.00159954														Kcat	0.540267	1.11436e-07	0.00167155
		ln(131000000000*M0)-((M1+(-2759.2))*(M0-334))/(8.314*M0))+(((-346)+(-2759.2)*ln(M0/334))/8.314); m1=-1477							10.309	0.270133	2.44734e-08	0.0003671														34.8853	0.270133	6.20615e-08	0.000930923														36.4259	0.270133	1.05963e-07	0.00158944
									ln Kcat	0.135067	1.65249e-08	0.000247873									0.540267	124	0.0704111	0.000504282		ln Kcat	0.135067	3.71554e-08	0.000557331									0.540267	50	0.128525	0.00159954		ln Kcat	0.135067	5.18607e-08	0.000777911
									2.33302	0.0675333	1.04364e-08	0.000156546										126	0.0712662			3.55207	0.0675333	1.70997e-08	0.000256495										52	0.131775			3.59528	0.0675333	2.51857e-08	0.000377786
										0.031977	4.4133e-09	6.61996e-05										128	0.0721495				0.031977	9.35203e-09	0.00014028										54	0.137193				0.031977	7.53967e-09	0.000113095
										0	0											130	0.0727468				0	0											56	0.13907				0	0
			2.33302	277	4	277	2.33302															132	0.0730908																58	0.141113
			3.55207	294	21	294	3.55207															134	0.074501																60	0.14613
			3.59528	298	25	298	3.59528															136	0.0751104																62	0.148564
			4.22286	300	27	300	4.22286															138	0.0765509																64	0.152217
	2510.83		3.92853	301.5	28.5	301.5	3.92853															140	0.0776642																66	0.153297
			4.52273	305	32	305	4.52273															142	0.0784288																68	0.158366
			4.2197	310	37	310	4.2197															144	0.0804828
			3.79764	314	41	314	3.79764															146	0.0818628
			3.39855	321	48	321	3.39855															148	0.0830191
			2.06252	325	52	325	2.06252															150	0.0852053
			3.03	323	50	323	3.03														0.270133	176	0.0838519	0.0003671														0.270133	100	0.122978	0.000930923
			3.18	320	47	320	3.18															178	0.0846956																102	0.124415
			2.2	283	10	283	2.2															180	0.0848259																104	0.127131
																						182	0.0869738																106	0.12886
																						184	0.0876942																108	0.130404
																						186	0.0877565																110	0.133558
																						188	0.0887583																112	0.134551
																						190	0.0891831																114	0.136141
		303																				192	0.0895809																116	0.136974
		2519																				194	0.0911119																118	0.140096
											Vol H2O2	Conc H2O2										196	0.0911863					Vol H2O2	Conc H2O2										120	0.141746					Vol H2O2	Conc H2O2
											9.47	0.031977										198	0.0919481					9.47	0.031977																9.47	0.031977
											20	0.0675333										200	0.09304					20	0.0675333																20	0.0675333
											40	0.135067																40	0.135067																40	0.135067
											80	0.270133																80	0.270133																80	0.270133
											160	0.540267									0.135067	150	0.0589624	0.000247873				160	0.540267									0.135067	100	0.0737031	0.000557331				160	0.540267
											320	1.08053										152	0.0595323					320	1.08053										102	0.0750119					320	1.08053
																						154	0.060054																104	0.0758537
																						156	0.060539																106	0.0771725
																						158	0.0613291																108	0.078986
																						160	0.061493																110	0.0791842
																						162	0.0621581																112	0.0804023
																						164	0.0623547																114	0.0815453
																						166	0.062837																116	0.0826237
																						168	0.063686																118	0.0833274
																						170	0.0640807																120	0.0853066
																						172	0.0644344																122	0.0862189
																					0.0675333	300	0.0578398	0.000156546														0.0675333	100	0.0440882	0.000256495
																						302	0.0581455																102	0.0447195
																						304	0.0587516																104	0.044672
																						306	0.0588366																106	0.0453419
																						308	0.0592552																108	0.0451075
																						310	0.0600133																110	0.0462332
																						312	0.0599837																112	0.0462381
																						314	0.0601179																114	0.0471775
																						316	0.0605497																116	0.0489777
																						318	0.060915																118	0.0483787
																						320	0.0613214																120	0.0487251
																						322	0.0613196																122	0.0492657
																						324	0.0618159																124	0.0501924
																						326	0.061804
																					0.031977	226	0.0377825	6.61996e-05														0.031977	80	0.0232584	0.00014028
																						228	0.0376461																82	0.023466
																						230	0.0381993																84	0.0235158
																						232	0.0383541																86	0.0239763
																						234	0.0380478																88	0.0242005
																						236	0.0384125																90	0.0245603
																						238	0.0384577																92	0.0247926
																						240	0.0385458																94	0.0251076
																						242	0.0386777																96	0.0252552
																						244	0.0388089																98	0.0256613
																						246	0.0393592																100	0.0257584
																						248	0.0391484																102	0.0260942
																						250	0.03906																104	0.0267982
[truncated: 148 more columns]

## Sheet: pH 7 data for MM fits
		MM Eq									HEMO 21 CpH 5_1		Initials	(m0*m1)/(m2+m0);m1=0.000000045;m2=0.3	760	813.333	840	853.333	860	863.51		45 degC	1.08053	12	0.0425805	0.000949119		HEMO 21.0 pH 5_2		Initials	(m0*m1)/(m2+m0);m1=0.000000045;m2=0.3	760	813.333	840	853.333	860	863.51		45 degC	1.08053	1.68391	0.0342851	0.000451653		HEMO 24.5 pH 5		Initials	(m0*m1)/(m2+m0);m1=0.000000045;m2=0.3	760
		(m0*m1)/(m2+m0);m1=.0000001;m2=.025									5.16e-09		AH											14	0.0442288			5.16e-09		AH											3.36781	0.034741			5.16e-09		AH
							2710.36							Water	2280	2440	2520	2560	2580	2590.53				16	0.0470678						Water	2280	2440	2520	2560	2580	2590.53				5.05172	0.0352195						Water	2280
														Buffer	100	100	100	100	100	100				18	0.050687						Buffer	100	100	100	100	100	100				6.73563	0.0357729						Buffer	100
		MMRT Eq fitting order												ABTS	100	100	100	100	100	100				20	0.0509384						ABTS	100	100	100	100	100	100				8.41953	0.0371008						ABTS	100
		ln(131000000000*M0)-((-2726+(M1*(M0-325)))/(8.314*M0))+((M2+M1*ln(M0/325))/8.314); m1=-1000; m2=-2000												H2O2	320	160	80	40	20	9.47				22	0.0529737						H2O2	320	160	80	40	20	9.47				10.1034	0.037843						H2O2	320
	Fit 1st and find Topt	ln(131000000000*M0)-((M1+(M2*(M0-325)))/(8.314*M0))+((M3+M2*ln(M0/325))/8.314); m1=-2500; m2=100; m3=200												MgSO4	100	100	100	100	100	100				24	0.0550842						MgSO4	100	100	100	100	100	100				11.7873	0.0382383						MgSO4	100
	Fit 2nd using Topt to find delH	ln(131000000000*M0)-((M1+(M2*(M0-303)))/(8.314*M0))+((M3+M2*ln(M0/303))/8.314); m1=20000; m2=100; m3=200												HEMO	100	100	100	100	100	100				26	0.0570748						HEMO	100	100	100	100	100	100				13.4713	0.0395924						HEMO	100
	Fit 3rd using Top del H and Topt to find del Hcp	ln(131000000000*M0)-(((-2519)+(M1*(M0-303)))/(8.314*M0))+((M2+M1*ln(M0/303))/8.314); m1=-1290; m2=-500																						28	0.0592233																15.1552	0.0400278
		ln(131000000000*M0)-((M1+(-2519))*(M0-303))/(8.314*M0))+(((-197.26)+(-2519)*ln(M0/303))/8.314); m1=-2648									Vmax	[H2O2] mM	Rate (M/sec)	Rate (A 730/sec)										30	0.0606096			Vmax	[H2O2] mM	Rate (M/sec)	Rate (A 730/sec)														Vmax	[H2O2] mM	Rate (M/sec)	Rate (A 730/sec)
											8.73e-08	1.08053	6.33e-08	0.000949119			run with 7.7 mM							32	0.0620863			3.01e-08	1.08053	3.01e-08	0.000451653			run with 7.7 mM											2.73e-08	1.08053	1.83e-08	0.000273882
	Fit 1st and find Topt	ln(131000000000*M0)-(((-2826)+(M1*(M0-M3)))/(8.314*M0))+((M2+M1*ln(M0/M3))/8.314); m1=-1290; m2=-500; m3=301									Kcat	0.540267	6.86e-08	0.00102832										34	0.0624444			Kcat	0.540267	2.98e-08	0.000447484														Kcat	0.540267	1.88e-08	0.000281328
		ln(131000000000*M0)-((-2726+(M1*(M0-325)))/(8.314*M0))+((M2+M1*ln(M0/325))/8.314); m1=-1000; m2=-2000									16.9	0.270133	3.54e-08	0.000530774										36	0.066562			5.84	0.270133	2.53e-08	0.000379953														5.29	0.270133	3.37e-08	0.000504784
		ln(131000000000*M0)-((-2726+(M1*(M0-325)))/(8.314*M0))+((M2+M1*ln(M0/325))/8.314); m1=-1000; m2=-2000									ln Kcat	0.135067	2.17e-08	0.000325381									0.540267	32	0.0890244	0.00102832		ln Kcat	0.135067	2.57e-08	0.000384987									0.540267	8.41953	0.0422278	0.000447484		ln Kcat	0.135067	3.42e-08	0.00051339
											2.83	0.0675333	2.06e-08	0.000308928										34	0.0912234			1.76	0.0675333	2.9e-08	0.000435056										10.1034	0.0428018			1.67	0.0675333	3.27e-08	0.0004902
			Heme 5			Myo pH 7						0.031977	1.16e-08	0.000173824										36	0.0933358				0.031977	1.63e-08	0.000244371										11.7873	0.0432085				0.031977	1.18e-08	0.000177658
			Lnk	Temp (K)	temp (C)	Ln K	Temp (K)	temp (C)				0	0											38	0.094738				0	0											13.4713	0.0440761				0	0
						3.36	296	23																40	0.0972122																15.1552	0.0452562
			2.83	294	21	3.23	303	30																42	0.0992667																16.8391	0.0452067
			1.76	294	21	4.79	298	25																44	0.102544																18.523	0.0469749
			1.67	297.5	24.5	4.06	309	36																46	0.104118
			1.31	318	45	4.48	303	30																48	0.105887
			1.45	307	34	4.16	283	10																50	0.107936
			2.02	300	27	5.39	313	40																52	0.109303
			1.48	302	29	4.43	288	15																54	0.111177
			1.73	312.2	39.2	5.09	300	27																56	0.113837
				319	46	5.03	306	33
			2.5	289	16	5.96	312.6	39.6															0.270133	50	0.0621759	0.000530774														0.270133	30.3103	0.0451816	0.000379953
			3.78	294	21	5.95	318	45																52	0.0634673																31.9942	0.045484
			1.31	304.4	31.4	3.23	304	31																54	0.0652546																33.6781	0.0453922
				309.8	36.8	3.58	303	30																56	0.0659996																35.362	0.0462704
			1.61	315	42	4.75	302	29																58	0.0667532																37.0459	0.0472109
			1.82	317	44	5.09	304	31																60	0.0678192																38.7299	0.0484477
				294	21	4.97	290	17																62	0.0685435																40.4138	0.0485179
				316	43																			64	0.0693138																42.0977	0.0492484
																								66	0.0716319
																								68	0.0725599
													Vol H2O2	Conc H2O2										70	0.0734643					Vol H2O2	Conc H2O2																Vol H2O2	Conc H2O2
													9.47	0.031977										72	0.0740888					9.47	0.031977																9.47	0.031977
													20	0.0675333										74	0.0748964					20	0.0675333																20	0.0675333
													40	0.135067																40	0.135067																40	0.135067
Pts to check analysis 1 again			To do:										80	0.270133																80	0.270133																80	0.270133
myo23CpH7 ...maybe double check data collection			Hemo pH5										160	0.540267									0.135067	42	0.0440434	0.000325381				160	0.540267									0.135067	18.523	0.0440886	0.000384987				160	0.540267
myo30pH7-1													320	1.08053										44	0.0462187					320	1.08053										20.2069	0.0452009					320	1.08053
myo36pH7	1st run ...data is not consistent enough		Example		This space would be set to green if first analysis is done																			46	0.0452644																21.8908	0.0458873
hemo21.0 pH 5																								48	0.0461777																23.5747	0.0463054
hemo34pH5			Hemo pH5	Temp (C)																				50	0.0464306																25.2586	0.0465684
hemo45CpH5 too many data points...			Cuvette 5	28																				52	0.0475572																26.9425	0.0477224
																								54	0.0473337
			Cuvette 3	25																				56	0.0500373
			Cuvette 6	68
			Cuvette 6	71
																							0.0675333	76	0.0486255	0.000308928														0.0675333	40.4138	0.0537075	0.000435056
																								78	0.0495439																42.0977	0.0539191
																								80	0.0505985																43.7816	0.0548296
																								82	0.051348																45.4655	0.0554735
																								84	0.0523011																47.1494	0.0561547
																								86	0.0524112																48.8333	0.0563243
																								88	0.0528358																50.5172	0.0599253
																								90	0.0527753																52.2011	0.0589732
																																									53.885	0.0588231
			Myo pH7																																						55.5689	0.0594098
																																									57.2528	0.0598083
			10																																						58.9367	0.0617204
			13																																						60.6206	0.0628103
			40
			50
			59		304																		0.031977	116	0.0429259	0.000173824														0.031977	39.562	0.0344224	0.000244371
																								118	0.0431214																41.2821	0.0358542
			1.14467e-09																					120	0.0431933																43.0022	0.0357735
			1.02005e-07	89.1133	5.21608	298																		122	0.0435601																44.7223	0.036748
			9.76198e-08	85.2823	5.13244	301																		124	0.0442848																46.4423	0.036016
					4.75	302																		126	0.0444878																48.1624	0.0367896
			9.54412e-08	83.379	5.09	300																		128	0.0446954																49.8825	0.0375267
					5.09	304																		130	0.0454066																51.6026	0.0370518
					5.09	304																		132	0.0459773																53.3227	0.0382354
					5.03	306																		134	0.0460603																55.0428	0.0386561
					5.32	308																		136	0.0457319																56.7629	0.0387592
			1.16801e-07	102.039	5.48257	304																																			58.4829	0.0395011
			1.13608e-07	99.2499	5.42696	307																																			60.203	0.0404056
			1.17905e-07	103.004	5.50158	310
					5.96	313
			1.11517e-07	97.4234	5.39	313
			1.4e-07	122.306	5.86044	314
			1.29529e-07	113.158	5.69521	317
			4.4024e-07	385	5.95221	318
			1.36877e-07	119.578	5.81201	320
			1.45705e-07	127.29	5.94719	323
			1.63451e-07	142.794	6.20403	326
			1.45177e-07	126.829	5.93925	329
			1.35884e-07	118.711	5.79646	332
					4.3	332
			7.92972e-08	69.2753	4.75457	335
[truncated: 657 more columns]

## Sheet: LPO, MYO Cu
	LPO	delta H=	20059.2	36722.1	R = 8.314 J/mol x K		del S=	-146.875	-92.0109			MYO	delta H =	41162.6	40507.5			del S=	-96.7665	-98.5789			CuSO4	delta H =	24177.1	42992.5			del S=	-264.31	-203.086
			2412.7	4416.9	y=	7.931	14.53							4951	4872.2	y=	13.958	13.74							2908	5171.1	y=	-6.194	1.17
	deg C	ln Kcat	kcat	deg K	kcat/deg K	ln kcat/deg K	1/deg K	36722.1				deg C	ln Kcat	kcat	deg K	kcat/deg K	ln kcat/deg K	1/deg K					deg C	ln Kcat	kcat	deg K	kcat/deg K	ln kcat/deg K	1/deg K
	8	5.19037	179.535	281	0.638914	-0.447985	0.00355872					22	2.8	16.4446	295	0.0557446	-2.88698	0.00338983					20	-10.8	2.03995e-05	293	6.96229e-08	-16.4802	0.00341297
	9	4.38232	80.0233	282	0.28377	-1.25959	0.0035461					22	2.02	7.53832	295	0.0255536	-3.66698	0.00338983					22	-10.4	3.04325e-05	295	1.03161e-07	-16.087	0.00338983
kb	13	4.89401	133.488	286	0.466743	-0.761977	0.0034965					22	2.15	8.58486	295	0.0291012	-3.53698	0.00338983					25	-10.3	3.36331e-05	298	1.12863e-07	-15.9971	0.0033557
1.38e-23	16	4.77	117.919	289	0.408025	-0.896427	0.00346021					24	3.2	24.5325	297	0.0826011	-2.49373	0.003367					25	-10.6	2.4916e-05	298	8.36108e-08	-16.2971	0.0033557
	18	4.93	138.38	291	0.475531	-0.743323	0.00343643					24	3.13	22.874	297	0.0770168	-2.56373	0.003367					26	-10.4	3.04325e-05	299	1.01781e-07	-16.1004	0.00334448
h	20	5.19	179.469	293	0.612521	-0.490173	0.00341297					24	3.2	24.5325	297	0.0826011	-2.49373	0.003367					28	-10.3	3.36331e-05	301	1.11738e-07	-16.0071	0.00332226
1.055e-34	22	5.54	254.678	295	0.863315	-0.146975	0.00338983					24	3.13482	22.9844	297	0.0773887	-2.55892	0.003367					30	-10.2	3.71703e-05	303	1.22674e-07	-15.9137	0.00330033
	24	5.29	198.343	297	0.667823	-0.403732	0.003367					26	3.13	22.874	299	0.0765016	-2.57044	0.00334448					30	-10.3	3.36331e-05	303	1.11e-07	-16.0137	0.00330033
kb/h	24	5.4	221.406	297	0.745476	-0.293732	0.003367					26	3.09	21.9771	299	0.0735019	-2.61044	0.00334448					32	-10	4.53999e-05	305	1.48852e-07	-15.7203	0.00327869
1.30806e+11	27	5.43	228.149	300	0.760497	-0.273782	0.00333333					26	3.08	21.7584	299	0.0727706	-2.62044	0.00334448					34	-10.1	4.10796e-05	307	1.3381e-07	-15.8268	0.00325733
	28	5.53	252.144	301	0.837687	-0.17711	0.00332226					26	3.13	22.874	299	0.0765016	-2.57044	0.00334448					36	-9.95	4.77276e-05	309	1.54458e-07	-15.6833	0.00323625
ln kb/h	30	5.59	267.736	303	0.883616	-0.123733	0.00330033					26	3.09	21.9771	299	0.0735019	-2.61044	0.00334448					38	-9.79	5.60089e-05	311	1.80093e-07	-15.5298	0.00321543
25.597	30	5.76	317.348	303	1.04735	0.0462672	0.00330033					26	3.08	21.7584	299	0.0727706	-2.62044	0.00334448					40	-9.4	8.27241e-05	313	2.64294e-07	-15.1462	0.00319489
	32	5.74	311.064	305	1.01988	0.0196882	0.00327869					28	3.13	22.874	301	0.0759933	-2.57711	0.00332226					40	-9.42	8.1086e-05	313	2.59061e-07	-15.1662	0.00319489
	34	5.76	317.348	307	1.03371	0.0331523	0.00325733					28	3.26	26.0495	301	0.0865433	-2.44711	0.00332226					40	-9.48	7.63639e-05	313	2.43974e-07	-15.2262	0.00319489
	37	6.54	692.287	310	2.23318	0.803428	0.00322581					28	3.13	22.874	301	0.0759933	-2.57711	0.00332226					42	-9.53	7.26396e-05	315	2.30602e-07	-15.2826	0.0031746
	37	6.45	632.702	310	2.04098	0.713428	0.00322581					28	3.26	26.0495	301	0.0865433	-2.44711	0.00332226					42	-9.46	7.79066e-05	315	2.47323e-07	-15.2126	0.0031746
	39	5.84	343.779	312	1.10186	0.0969968	0.00320513					30	3.5	33.1155	303	0.109292	-2.21373	0.00330033					44	-9.46	7.79066e-05	317	2.45762e-07	-15.2189	0.00315457
	39	5.91	368.706	312	1.18175	0.166997	0.00320513					30	3.38	29.3708	303	0.0969332	-2.33373	0.00330033					44	-9.55	7.12013e-05	317	2.2461e-07	-15.3089	0.00315457
	41	5.88	357.809	314	1.13952	0.130607	0.00318471					30	3.5	33.1155	303	0.109292	-2.21373	0.00330033					44	-9.21	0.000100034	317	3.15565e-07	-14.9689	0.00315457
	41	6.5	665.142	314	2.11829	0.750607	0.00318471					30	3.38	29.3708	303	0.0969332	-2.33373	0.00330033					44	-9.15	0.00010622	317	3.35078e-07	-14.9089	0.00315457
	43	5.99	399.415	316	1.26397	0.234258	0.00316456					32	3.61	36.9661	305	0.1212	-2.11031	0.00327869					44	-9.63	6.5727e-05	317	2.07341e-07	-15.3889	0.00315457
	43	6.18	482.992	316	1.52846	0.424258	0.00316456					32	3.61	36.9661	305	0.1212	-2.11031	0.00327869					46	-9.38	8.43952e-05	319	2.64562e-07	-15.1452	0.0031348
	45	6.67	788.396	318	2.47923	0.907949	0.00314465					34	3.33	27.9383	307	0.0910044	-2.39685	0.00325733					46	-9.17	0.000104117	319	3.26384e-07	-14.9352	0.0031348
	48	6.38	589.928	321	1.83778	0.608559	0.00311526					34	3.95	51.9354	307	0.169171	-1.77685	0.00325733					46	-9.38	8.43952e-05	319	2.64562e-07	-15.1452	0.0031348
	48	6.14	464.054	321	1.44565	0.368559	0.00311526					34	3.33	27.9383	307	0.0910044	-2.39685	0.00325733					48	-9.25	9.61117e-05	321	2.99413e-07	-15.0214	0.00311526
	48	6.18	482.992	321	1.50465	0.408559	0.00311526					34	3.95	51.9354	307	0.169171	-1.77685	0.00325733					48	-9.39	8.35555e-05	321	2.60297e-07	-15.1614	0.00311526
	48	6.09	441.421	321	1.37514	0.318559	0.00311526					35	3.45	31.5004	308	0.102274	-2.2801	0.00324675					50	-9.24	9.70776e-05	323	3.0055e-07	-15.0177	0.00309598
	50	7.23	1380.22	323	4.27313	1.45235	0.00309598					35	3.45	31.5004	308	0.102274	-2.2801	0.00324675					50	-9.34	8.78394e-05	323	2.71949e-07	-15.1177	0.00309598
	50	7.23	1380.22	323	4.27313	1.45235	0.00309598					36	3.42	30.5694	309	0.0989301	-2.31334	0.00323625					52	-9.51	7.4107e-05	325	2.28022e-07	-15.2938	0.00307692
	50	6.75	854.059	323	2.64414	0.972348	0.00309598					36	3.91	49.899	309	0.161485	-1.82334	0.00323625					52	-9.29	9.23431e-05	325	2.84132e-07	-15.0738	0.00307692
	52	7.23	1380.22	325	4.24684	1.44617	0.00307692					36	3.42	30.5694	309	0.0989301	-2.31334	0.00323625					52	-9.1	0.000111666	325	3.43587e-07	-14.8838	0.00307692
	52	6.19	487.846	325	1.50106	0.406175	0.00307692					36	3.91	49.899	309	0.161485	-1.82334	0.00323625					54	-9.28	9.32711e-05	327	2.85233e-07	-15.07	0.0030581
	54	7.23	1380.22	327	4.22086	1.44004	0.0030581					40	3.81	45.1504	313	0.144251	-1.9362	0.00319489					54	-9.31	9.05145e-05	327	2.76803e-07	-15.1	0.0030581
	54	6.09	441.421	327	1.34991	0.30004	0.0030581					40	4.11	60.9467	313	0.194718	-1.6362	0.00319489					54	-9.28	9.32711e-05	327	2.85233e-07	-15.07	0.0030581
	54	6.17	478.186	327	1.46234	0.38004	0.0030581					40	3.81	45.1504	313	0.144251	-1.9362	0.00319489					54	-9.63	6.5727e-05	327	2.01e-07	-15.42	0.0030581
	54	6.21	497.701	327	1.52202	0.42004	0.0030581					40	4.11	60.9467	313	0.194718	-1.6362	0.00319489					56	-9.28	9.32711e-05	329	2.83499e-07	-15.0761	0.00303951
	58	7.23	1380.22	331	4.16986	1.42788	0.00302115					42	4.02	55.7011	315	0.176829	-1.73257	0.0031746					56	-9.06	0.000116223	329	3.53261e-07	-14.8561	0.00303951
	58	6.53	685.398	331	2.07069	0.727882	0.00302115					42	4.02	55.7011	315	0.176829	-1.73257	0.0031746					58	-9.42	8.1086e-05	331	2.44973e-07	-15.2221	0.00302115
	60	6.68	796.319	333	2.39135	0.871858	0.003003					44	4.25	70.1054	317	0.221153	-1.5089	0.00315457					58	-9.52	7.33697e-05	331	2.21661e-07	-15.3221	0.00302115
	60	6.73	837.147	333	2.51396	0.921858	0.003003					44	4.03	56.2609	317	0.177479	-1.7289	0.00315457					58	-9.18	0.000103081	331	3.11422e-07	-14.9821	0.00302115
	62	6.53	685.398	335	2.04596	0.715869	0.00298507					44	4.25	70.1054	317	0.221153	-1.5089	0.00315457					60	-9.36	8.61001e-05	333	2.58559e-07	-15.1681	0.003003
	62	6.51	671.826	335	2.00545	0.695869	0.00298507					44	4.03	56.2609	317	0.177479	-1.7289	0.00315457					60	-8.73	0.000161662	333	4.85473e-07	-14.5381	0.003003
	62	6.33	561.157	335	1.67509	0.515869	0.00298507					48	4.33	75.9443	321	0.236587	-1.44144	0.00311526					60	-9.54	7.19168e-05	333	2.15967e-07	-15.3481	0.003003
	64	6.33	561.157	337	1.66515	0.509917	0.00296736					48	4.46	86.4875	321	0.269431	-1.31144	0.00311526					60	-9.34	8.78394e-05	333	2.63782e-07	-15.1481	0.003003
	64	6.24	512.859	337	1.52184	0.419917	0.00296736					48	4.33	75.9443	321	0.236587	-1.44144	0.00311526					60	-9.06	0.000116223	333	3.49018e-07	-14.8681	0.003003
	64	6.33	561.157	337	1.66515	0.509917	0.00296736					48	4.46	86.4875	321	0.269431	-1.31144	0.00311526					62	-9.15	0.00010622	335	3.17074e-07	-14.9641	0.00298507
	65	5.69	295.894	338	0.875425	-0.133046	0.00295858					52	4.28	72.2404	325	0.222278	-1.50383	0.00307692					62	-9.07	0.000115067	335	3.43482e-07	-14.8841	0.00298507
	65	6.62	749.945	338	2.21877	0.796954	0.00295858					52	4.57	96.5441	325	0.297059	-1.21383	0.00307692					62	-9.09	0.000112788	335	3.36681e-07	-14.9041	0.00298507
	65	6.13	459.436	338	1.35928	0.306954	0.00295858					52	4.28	72.2404	325	0.222278	-1.50383	0.00307692					62	-9.32	8.96139e-05	335	2.67504e-07	-15.1341	0.00298507
	65	6.19	487.846	338	1.44333	0.366954	0.00295858					52	4.57	96.5441	325	0.297059	-1.21383	0.00307692					64	-9.1	0.000111666	337	3.31353e-07	-14.9201	0.00296736
	68	6.54	692.287	341	2.03017	0.708118	0.00293255					54	4.72	112.168	327	0.343022	-1.06996	0.0030581					64	-9.15	0.00010622	337	3.15192e-07	-14.9701	0.00296736
	68	6.23	507.755	341	1.48902	0.398118	0.00293255					54	4.72	112.168	327	0.343022	-1.06996	0.0030581					64	-9.28	9.32711e-05	337	2.76769e-07	-15.1001	0.00296736
	68	5.9	365.037	341	1.07049	0.0681175	0.00293255					58	4.89	132.954	331	0.401672	-0.912118	0.00302115
	68	6.19	487.846	341	1.43063	0.358118	0.00293255					58	4.89	132.954	331	0.401672	-0.912118	0.00302115
												62	4.91	135.639	335	0.404894	-0.904131	0.00298507
												62	4.82	123.965	335	0.370045	-0.994131	0.00298507
												62	4.92	137.003	335	0.408963	-0.894131	0.00298507
												62	4.82	123.965	335	0.370045	-0.994131	0.00298507
												64	5.22	184.934	337	0.548766	-0.600083	0.00296736
												64	4.92	137.003	337	0.406536	-0.900083	0.00296736
												64	4.96	142.594	337	0.423127	-0.860083	0.00296736
												64	4.92	137.003	337	0.406536	-0.900083	0.00296736

## Sheet: Myo and Heme spectra
Hemoglobin	380.2	0.623497		Myoglobin	380.2	0.636434			Hemo with h2o2	380.2	0.586808			Myo with h2o2	380.2	0.622559			Hemo with h2o2 after 5 min	380.2	0.532591
MET	381	0.636267		MET	381	0.645153			Oxy Hemo	381	0.604517			Oxymyo	381	0.633283				381	0.552591
	381.7	0.67246			381.7	0.679143				381.7	0.629267				381.7	0.660717				381.7	0.586567
	382.5	0.705741			382.5	0.720352				382.5	0.665531				382.5	0.682591				382.5	0.607648
	383.2	0.739507			383.2	0.752937				383.2	0.703335				383.2	0.721233				383.2	0.629473
	384	0.761784			384	0.777715				384	0.74426				384	0.754219				384	0.648115
	384.7	0.797671			384.7	0.81842				384.7	0.77422				384.7	0.787958				384.7	0.681433
	385.5	0.833383			385.5	0.860226				385.5	0.810553				385.5	0.82761				385.5	0.713357
	386.2	0.864257			386.2	0.890122				386.2	0.852729				386.2	0.8688				386.2	0.748762
	386.9	0.898157			386.9	0.924709				386.9	0.902236				386.9	0.919119				386.9	0.773859
	387.7	0.934373			387.7	0.970587				387.7	0.948489				387.7	0.962894				387.7	0.790565
	388.4	1.00203			388.4	1.03052				388.4	0.990342				388.4	1.01814				388.4	0.822332
	389.2	1.05726			389.2	1.08477				389.2	1.04362				389.2	1.07825				389.2	0.85377
	389.9	1.12427			389.9	1.15035				389.9	1.08351				389.9	1.12918				389.9	0.886441
	390.7	1.18226			390.7	1.20943				390.7	1.15559				390.7	1.19124				390.7	0.907114
	391.4	1.25734			391.4	1.28381				391.4	1.22177				391.4	1.25876				391.4	0.941881
	392.2	1.33269			392.2	1.35027				392.2	1.30657				392.2	1.3369				392.2	0.973371
	392.9	1.38777			392.9	1.42869				392.9	1.36571				392.9	1.39186				392.9	1.00462
	393.7	1.44121			393.7	1.48759				393.7	1.4337				393.7	1.44868				393.7	1.02452
	394.4	1.48828			394.4	1.54188				394.4	1.48148				394.4	1.49772				394.4	1.04591
	395.2	1.53583			395.2	1.58554				395.2	1.5133				395.2	1.5478				395.2	1.0637
	395.9	1.56409			395.9	1.61364				395.9	1.53977				395.9	1.58266				395.9	1.07959
	396.7	1.59271			396.7	1.65271				396.7	1.576				396.7	1.61233				396.7	1.09716
	397.4	1.62121			397.4	1.67161				397.4	1.61364				397.4	1.64437				397.4	1.11392
	398.2	1.65629			398.2	1.69398				398.2	1.63621				398.2	1.65724				398.2	1.1344
	398.9	1.67556			398.9	1.70423				398.9	1.64375				398.9	1.67433				398.9	1.152
	399.7	1.69527			399.7	1.71971				399.7	1.67766				399.7	1.69363				399.7	1.17607
	400.4	1.70163			400.4	1.74186				400.4	1.69575				400.4	1.71964				400.4	1.19694
	401.1	1.71626			401.1	1.75972				401.1	1.71937				401.1	1.74209				401.1	1.21816
	401.9	1.73696			401.9	1.79409				401.9	1.72786				401.9	1.75766				401.9	1.23719
	402.6	1.76165			402.6	1.8078				402.6	1.75643				402.6	1.78075				402.6	1.25486
	403.4	1.78146			403.4	1.833				403.4	1.78083				403.4	1.79689				403.4	1.27278
	404.1	1.8039			404.1	1.85327				404.1	1.80836				404.1	1.8225				404.1	1.29225
	404.9	1.82092			404.9	1.87095				404.9	1.82973				404.9	1.84227				404.9	1.31278
	405.6	1.84241			405.6	1.89088				405.6	1.85087				405.6	1.866				405.6	1.33283
	406.4	1.84892			406.4	1.9063				406.4	1.86644				406.4	1.87565				406.4	1.35308
	407.1	1.85566			407.1	1.92453				407.1	1.86886				407.1	1.88523				407.1	1.37059
	407.9	1.87542			407.9	1.93708				407.9	1.88756				407.9	1.89735				407.9	1.39099
	408.6	1.89381			408.6	1.94289				408.6	1.89208				408.6	1.91294				408.6	1.4039
	409.4	1.91442			409.4	1.95625				409.4	1.91875				409.4	1.93031				409.4	1.42262
	410.1	1.91637			410.1	1.96855				410.1	1.92969				410.1	1.94521				410.1	1.44036
	410.9	1.92763			410.9	1.9804				410.9	1.93939				410.9	1.95823				410.9	1.45963
	411.6	1.9383			411.6	1.9911				411.6	1.94611				411.6	1.96865				411.6	1.47851
	412.4	1.94607			412.4	1.99389				412.4	1.9459				412.4	1.97553				412.4	1.49238
	413.1	1.93899			413.1	1.98632				413.1	1.94613				413.1	1.97467				413.1	1.5019
	413.8	1.9348			413.8	1.99053				413.8	1.94766				413.8	1.97757				413.8	1.51018
	414.6	1.93745			414.6	2.00278				414.6	1.95473				414.6	1.99242				414.6	1.5196
	415.3	1.94289			415.3	2.03121				415.3	1.9745				415.3	2.01168				415.3	1.52796
	416.1	1.94921			416.1	2.04496				416.1	1.97842				416.1	2.02644				416.1	1.5352
	416.8	1.94481			416.8	2.04716				416.8	1.98647				416.8	2.02548				416.8	1.5373
	417.6	1.94348			417.6	2.04167				417.6	1.98065				417.6	2.02498				417.6	1.5351
	418.3	1.93211			418.3	2.04292				418.3	1.98477				418.3	2.03249				418.3	1.52805
	419.1	1.92113			419.1	2.04661				419.1	1.98365				419.1	2.03636				419.1	1.51765
	419.8	1.91003			419.8	2.05624				419.8	1.99554				419.8	2.04415				419.8	1.50901
	420.6	1.89549			420.6	2.06147				420.6	1.99936				420.6	2.04042				420.6	1.49563
	421.3	1.8707			421.3	2.06004				421.3	2.00415				421.3	2.04739				421.3	1.48075
	422.1	1.83834			422.1	2.04897				422.1	1.99849				422.1	2.04388				422.1	1.45899
	422.8	1.80666			422.8	2.0466				422.8	1.99397				422.8	2.04362				422.8	1.43608
	423.6	1.77132			423.6	2.04961				423.6	1.99151				423.6	2.042				423.6	1.41026
	424.3	1.73355			424.3	2.04692				424.3	1.98997				424.3	2.04672				424.3	1.38575
	425.1	1.6896			425.1	2.04928				425.1	1.99248				425.1	2.05762				425.1	1.35795
	425.8	1.64031			425.8	2.0416				425.8	1.98931				425.8	2.05174				425.8	1.32755
	426.6	1.58345			426.6	2.03425				426.6	1.99012				426.6	2.06195				426.6	1.2941
	427.3	1.5237			427.3	2.01639				427.3	1.9774				427.3	2.05573				427.3	1.25835
	428	1.47326			428	2.0131				428	1.96909				428	2.06364				428	1.22363
	428.8	1.42413			428.8	1.99888				428.8	1.95068				428.8	2.04546				428.8	1.18738
	429.5	1.37846			429.5	1.98794				429.5	1.94956				429.5	2.04971				429.5	1.1523
	430.3	1.32835			430.3	1.95856				430.3	1.93297				430.3	2.05085				430.3	1.11743
	431	1.28059			431	1.94345				431	1.92136				431	2.05634				431	1.0829
	431.8	1.23318			431.8	1.90804				431.8	1.89262				431.8	2.04955				431.8	1.04745
	432.5	1.18868			432.5	1.87356				432.5	1.86171				432.5	2.03637				432.5	1.0122
	433.3	1.14671			433.3	1.83846				433.3	1.82216				433.3	2.04003				433.3	0.980256
	434	1.10594			434	1.80029				434	1.78455				434	2.0339				434	0.948616
	434.8	1.06878			434.8	1.7601				434.8	1.74376				434.8	2.03367				434.8	0.919071
	435.5	1.03278			435.5	1.70707				435.5	1.69809				435.5	2.01674				435.5	0.888706
	436.3	1.00027			436.3	1.65756				436.3	1.64955				436.3	2.0098				436.3	0.861392
	437	0.970494			437	1.60484				437	1.59849				437	2.00917				437	0.834549
	437.8	0.941893			437.8	1.55496				437.8	1.54675				437.8	2.00132				437.8	0.810049
	438.5	0.916361			438.5	1.50947				438.5	1.49494				438.5	1.9931				438.5	0.787948
	439.3	0.890407			439.3	1.46507				439.3	1.44712				439.3	1.96867				439.3	0.766084
	440	0.866987			440	1.42647				440	1.40402				440	1.95996				440	0.745697
	440.7	0.844327			440.7	1.3886				440.7	1.35843				440.7	1.93665				440.7	0.725626
	441.5	0.82469			441.5	1.35464				441.5	1.31597				441.5	1.92113				441.5	0.708488
	442.2	0.807328			442.2	1.32167				442.2	1.26939				442.2	1.88819				442.2	0.691824
	443	0.791131			443	1.29255				443	1.22771				443	1.86092				443	0.676155
	443.7	0.775072			443.7	1.26478				443.7	1.18581				443.7	1.82489				443.7	0.660353
	444.5	0.760654			444.5	1.23976				444.5	1.15016				444.5	1.79148				444.5	0.646689
	445.2	0.748326			445.2	1.21391				445.2	1.11632				445.2	1.75334				445.2	0.633366
	446	0.737079			446	1.1904				446	1.08333				446	1.71121				446	0.621912
	446.7	0.7262			446.7	1.16802				446.7	1.04974				446.7	1.66988				446.7	0.611165
	447.5	0.714848			447.5	1.14692				447.5	1.01753				447.5	1.62227				447.5	0.601054
	448.2	0.705732			448.2	1.12875				448.2	0.98793				448.2	1.57731				448.2	0.591754
	449	0.697124			449	1.11047				449	0.961407				449	1.52959				449	0.582645
	449.7	0.689475			449.7	1.09481				449.7	0.935763				449.7	1.48508				449.7	0.574348
	450.5	0.682344			450.5	1.079				450.5	0.911481				450.5	1.44205				450.5	0.566116
	451.2	0.676884			451.2	1.06477				451.2	0.889205				451.2	1.4034				451.2	0.558216
	452	0.671232			452	1.05136				452	0.868481				452	1.36953				452	0.551258
	452.7	0.665608			452.7	1.03958				452.7	0.849357				452.7	1.33527				452.7	0.54381
	453.5	0.659717			453.5	1.0291				453.5	0.830107				453.5	1.30055				453.5	0.536658
	454.2	0.65515			454.2	1.01909				454.2	0.812032				454.2	1.26869				454.2	0.5305
	454.9	0.651237			454.9	1.0104				454.9	0.79464				454.9	1.24063				454.9	0.525334
	455.7	0.647182			455.7	1.00175				455.7	0.778546				455.7	1.21307				455.7	0.519271
	456.4	0.64259			456.4	0.994492				456.4	0.76157				456.4	1.18521				456.4	0.513091
	457.2	0.637026			457.2	0.986879				457.2	0.746555				457.2	1.16087				457.2	0.507004
	457.9	0.632693			457.9	0.981024				457.9	0.731415				457.9	1.13594				457.9	0.501734
	458.7	0.629983			458.7	0.974566				458.7	0.718354				458.7	1.11258				458.7	0.495275
	459.4	0.627799			459.4	0.967757				459.4	0.704333				459.4	1.08763				459.4	0.490183
	460.2	0.625591			460.2	0.96049				460.2	0.691162				460.2	1.06562				460.2	0.485357
	460.9	0.621866			460.9	0.955412				460.9	0.678643				460.9	1.0444				460.9	0.480862
	461.7	0.618793			461.7	0.951774				461.7	0.666208				461.7	1.02496				461.7	0.474827
	462.4	0.614195			462.4	0.947742				462.4	0.655202				462.4	1.00718				462.4	0.469482
	463.2	0.611436			463.2	0.941777				463.2	0.644369				463.2	0.989972				463.2	0.465173
	463.9	0.60885			463.9	0.937067				463.9	0.634651				463.9	0.973276				463.9	0.462421
	464.7	0.60653			464.7	0.934145				464.7	0.62452				464.7	0.95734				464.7	0.459987
	465.4	0.604548			465.4	0.931814				465.4	0.614434				465.4	0.941017				465.4	0.45678
	466.2	0.602389			466.2	0.928063				466.2	0.604752				466.2	0.925297				466.2	0.453081
	466.9	0.600737			466.9	0.924172				466.9	0.595037				466.9	0.91016				466.9	0.447875
	467.6	0.598982			467.6	0.922065				467.6	0.586832				467.6	0.895717				467.6	0.443613
	468.4	0.597051			468.4	0.91919				468.4	0.578279				468.4	0.880293				468.4	0.4393
	469.1	0.596177			469.1	0.916508				469.1	0.570644				469.1	0.86725				469.1	0.43614
	469.9	0.594005			469.9	0.912691				469.9	0.561877				469.9	0.852419				469.9	0.431958
	470.6	0.592654			470.6	0.911981				470.6	0.554362				470.6	0.841474				470.6	0.428984
	471.4	0.591205			471.4	0.909892				471.4	0.546916				471.4	0.827812				471.4	0.425171
	472.1	0.590657			472.1	0.909775				472.1	0.5406				472.1	0.818508				472.1	0.422383
	472.9	0.589059			472.9	0.908472				472.9	0.534785				472.9	0.807248				472.9	0.418988
	473.6	0.589157			473.6	0.909129				473.6	0.529565				473.6	0.798346				473.6	0.417142
	474.4	0.589302			474.4	0.908442				474.4	0.524669				474.4	0.789971				474.4	0.415394
	475.1	0.590948			475.1	0.907772				475.1	0.519544				475.1	0.782325				475.1	0.41293
	475.9	0.590437			475.9	0.907759				475.9	0.513818				475.9	0.774368				475.9	0.409676
	476.6	0.591151			476.6	0.906877				476.6	0.509026				476.6	0.767141				476.6	0.406406
	477.4	0.591779			477.4	0.907775				477.4	0.505173				477.4	0.760425				477.4	0.40381
	478.1	0.59345			478.1	0.907781				478.1	0.50144				478.1	0.755419				478.1	0.401481
	478.9	0.595466			478.9	0.910908				478.9	0.497936				478.9	0.749111				478.9	0.399046
	479.6	0.598026			479.6	0.912159				479.6	0.495221				479.6	0.745093				479.6	0.39654
	480.3	0.600203			480.3	0.914436				480.3	0.492897				480.3	0.740337				480.3	0.394143
	481.1	0.602115			481.1	0.91704				481.1	0.49075				481.1	0.738215				481.1	0.392159
	481.8	0.604083			481.8	0.919814				481.8	0.488117				481.8	0.734773				481.8	0.390119
	482.6	0.607713			482.6	0.923202				482.6	0.487647				482.6	0.733736				482.6	0.389388
	483.3	0.609375			483.3	0.92466				483.3	0.486156				483.3	0.731899				483.3	0.387997
	484.1	0.611112			484.1	0.929016				484.1	0.484405				484.1	0.731274				484.1	0.386804
	484.8	0.613251			484.8	0.93142				484.8	0.483459				484.8	0.730915				484.8	0.383848
	485.6	0.616315			485.6	0.934353				485.6	0.48209				485.6	0.730755				485.6	0.381468
	486.3	0.620253			486.3	0.93787				486.3	0.482881				486.3	0.731712				486.3	0.379394
	487.1	0.622673			487.1	0.942142				487.1	0.481091				487.1	0.732987				487.1	0.377295
	487.8	0.626636			487.8	0.948109				487.8	0.481302				487.8	0.736348				487.8	0.375713
	488.6	0.628721			488.6	0.951412				488.6	0.480351				488.6	0.737426				488.6	0.373746
	489.3	0.632001			489.3	0.9579				489.3	0.480567				489.3	0.738562				489.3	0.372744
	490.1	0.634101			490.1	0.961352				490.1	0.48048				490.1	0.739284				490.1	0.371764
	490.8	0.637501			490.8	0.965254				490.8	0.481381				490.8	0.741914				490.8	0.370701
	491.6	0.64012			491.6	0.969184				491.6	0.48196				491.6	0.745492				491.6	0.369577
	492.3	0.642523			492.3	0.972087				492.3	0.482253				492.3	0.746306				492.3	0.366824
	493.1	0.643825			493.1	0.974744				493.1	0.481806				493.1	0.748932				493.1	0.364738
	493.8	0.645186			493.8	0.976391				493.8	0.48264				493.8	0.751291				493.8	0.363031
	494.5	0.64782			494.5	0.982236				494.5	0.484686				494.5	0.757873				494.5	0.362824
	495.3	0.64946			495.3	0.987706				495.3	0.486628				495.3	0.762604				495.3	0.361632
	496	0.650996			496	0.991764				496	0.487129				496	0.76744				496	0.360899
	496.8	0.651481			496.8	0.994025				496.8	0.487094				496.8	0.771687				496.8	0.35904
	497.5	0.651978			497.5	0.9973				497.5	0.487069				497.5	0.775095				497.5	0.357626
	498.3	0.651757			498.3	0.997691				498.3	0.487681				498.3	0.778136				498.3	0.355358
	499	0.650613			499	0.997395				499	0.488709				499	0.77987				499	0.354433
	499.8	0.650703			499.8	0.997001				499.8	0.490646				499.8	0.78484				499.8	0.353667
	500.5	0.650298			500.5	0.996607				500.5	0.492614				500.5	0.78972				500.5	0.35283
	501.3	0.649247			501.3	0.996322				501.3	0.493882				501.3	0.794785				501.3	0.35126
	502	0.647605			502	0.996084				502	0.493943				502	0.797705				502	0.350066
	502.8	0.644759			502.8	0.995934				502.8	0.495309				502.8	0.801791				502.8	0.348359
	503.5	0.643244			503.5	0.996702				503.5	0.497072				503.5	0.807841				503.5	0.34682
	504.3	0.640249			504.3	0.994227				504.3	0.499228				504.3	0.812717				504.3	0.345433
	505	0.637307			505	0.992965				505	0.499988				505	0.816195				505	0.344248
	505.8	0.632594			505.8	0.988899				505.8	0.501719				505.8	0.817576				505.8	0.343175
	506.5	0.630095			506.5	0.987398				506.5	0.503587				506.5	0.82337				506.5	0.342537
	507.2	0.626032			507.2	0.981433				507.2	0.505712				507.2	0.828256				507.2	0.341247
	508	0.623407			508	0.977483				508	0.507203				508	0.834556				508	0.339801
	508.7	0.617958			508.7	0.97011				508.7	0.508054				508.7	0.838353				508.7	0.337232
	509.5	0.614367			509.5	0.966001				509.5	0.508557				509.5	0.843695				509.5	0.336281
	510.2	0.609814			510.2	0.958761				510.2	0.509244				510.2	0.846819				510.2	0.335307
	511	0.605833			511	0.954446				511	0.510435				511	0.849126				511	0.334773
	511.8	0.601782			511.8	0.948938				511.8	0.512603				511.8	0.850417				511.8	0.33405
	512.5	0.597598			512.5	0.945269				512.5	0.514207				512.5	0.854414				512.5	0.333164
	513.2	0.594288			513.2	0.939136				513.2	0.515681				513.2	0.857749				513.2	0.33202
	513.9	0.589606			513.9	0.93188				513.9	0.51694				513.9	0.861589				513.9	0.330138
	514.7	0.58579			514.7	0.924186				514.7	0.518448				514.7	0.864156				514.7	0.328996
	515.4	0.581807			515.4	0.916734				515.4	0.519961				515.4	0.86736				515.4	0.32736
	516.1	0.577407			516.1	0.909679				516.1	0.521477				516.1	0.869682				516.1	0.325578
	516.8	0.573224			516.8	0.902725				516.8	0.522692				516.8	0.872483				516.8	0.323955
	517.6	0.569147			517.6	0.894699				517.6	0.523716				517.6	0.875475				517.6	0.322798
	518.3	0.566763			518.3	0.88813				518.3	0.526126				518.3	0.87883				518.3	0.322876
	519	0.563052			519	0.881172				519	0.528507				519	0.881456				519	0.322882
	519.7	0.558606			519.7	0.874964				519.7	0.530791				519.7	0.884284				519.7	0.322255
	520.5	0.553835			520.5	0.867539				520.5	0.532453				520.5	0.886966				520.5	0.321239
	521.2	0.550811			521.2	0.859871				521.2	0.534331				521.2	0.891073				521.2	0.319695
	521.9	0.546778			521.9	0.851307				521.9	0.536165				521.9	0.891845				521.9	0.318534
	522.7	0.543775			522.7	0.844597				522.7	0.537869				522.7	0.894055				522.7	0.317224
	523.4	0.53975			523.4	0.838977				523.4	0.539734				523.4	0.893952				523.4	0.315932
	524.1	0.536943			524.1	0.832672				524.1	0.54231				524.1	0.897252				524.1	0.314508
	524.8	0.533929			524.8	0.825834				524.8	0.544513				524.8	0.899607				524.8	0.313919
	525.6	0.531098			525.6	0.817239				525.6	0.54688				525.6	0.901764				525.6	0.314106
	526.3	0.528193			526.3	0.812355				526.3	0.548902				526.3	0.904987				526.3	0.314529
	527	0.525305			527	0.806724				527	0.550974				527	0.906971				527	0.315077
	527.7	0.522647			527.7	0.802453				527.7	0.552585				527.7	0.910135				527.7	0.314689
	528.5	0.521336			528.5	0.79581				528.5	0.5549				528.5	0.911678				528.5	0.313914
	529.2	0.519068			529.2	0.790595				529.2	0.556445				529.2	0.914858				529.2	0.313068
	529.9	0.51666			529.9	0.785048				529.9	0.559394				529.9	0.918875				529.9	0.312351
	530.7	0.5136			530.7	0.780218				530.7	0.561474				530.7	0.92168				530.7	0.312586
	531.4	0.511432			531.4	0.77554				531.4	0.564236				531.4	0.924544				531.4	0.312324
	532.1	0.508764			532.1	0.771293				532.1	0.566699				532.1	0.927975				532.1	0.312692
	532.8	0.505813			532.8	0.767068				532.8	0.569181				532.8	0.933357				532.8	0.313578
	533.6	0.50299			533.6	0.762629				533.6	0.572255				533.6	0.940305				533.6	0.31434
	534.3	0.500344			534.3	0.758218				534.3	0.57415				534.3	0.943696				534.3	0.314776
	535	0.497364			535	0.754612				535	0.576887				535	0.947248				535	0.314233
	535.7	0.49468			535.7	0.750317				535.7	0.579489				535.7	0.949785				535.7	0.314857
	536.5	0.492252			536.5	0.747461				536.5	0.582923				536.5	0.956148				536.5	0.314778
	537.2	0.489917			537.2	0.743841				537.2	0.586595				537.2	0.961864				537.2	0.315915
	537.9	0.487147			537.9	0.738864				537.9	0.589002				537.9	0.964612				537.9	0.315272
	538.7	0.483192			538.7	0.733898				538.7	0.591714				538.7	0.967184				538.7	0.315724
	539.4	0.479649			539.4	0.727431				539.4	0.594477				539.4	0.970479				539.4	0.315564
	540.1	0.475585			540.1	0.72326				540.1	0.597917				540.1	0.976132				540.1	0.316087
	540.8	0.47107			540.8	0.717339				540.8	0.600022				540.8	0.980701				540.8	0.316206
	541.6	0.46632			541.6	0.71135				541.6	0.600943				541.6	0.984219				541.6	0.316769
	542.3	0.461294			542.3	0.7049				542.3	0.601583				542.3	0.989148				542.3	0.316496
	543	0.457214			543	0.69825				543	0.602733				543	0.993098				543	0.3161
	543.7	0.452807			543.7	0.692648				543.7	0.603929				543.7	0.997908				543.7	0.315115
	544.5	0.44819			544.5	0.685874				544.5	0.60533				544.5	1.00084				544.5	0.3153
	545.2	0.443674			545.2	0.678922				545.2	0.605181				545.2	1.00317				545.2	0.31555
	545.9	0.437928			545.9	0.671159				545.9	0.604679				545.9	1.00206				545.9	0.315493
	546.7	0.432314			546.7	0.662559				546.7	0.603127				546.7	1.00231				546.7	0.313789
	547.4	0.426356			547.4	0.654095				547.4	0.601268				547.4	1.00076				547.4	0.312094
	548.1	0.420835			548.1	0.645723				548.1	0.599197				548.1	1.00319				548.1	0.310666
	548.8	0.415721			548.8	0.637933				548.8	0.595691				548.8	1.00065				548.8	0.309923
	549.6	0.410561			549.6	0.628786				549.6	0.593401				549.6	0.999975				549.6	0.308771
	550.3	0.405846			550.3	0.619478				550.3	0.590781				550.3	0.997483				550.3	0.307886
	551	0.400495			551	0.609682				551	0.587798				551	0.994309				551	0.306325
	551.7	0.39573			551.7	0.60072				551.7	0.585158				551.7	0.990574				551.7	0.305621
	552.5	0.391266			552.5	0.590796				552.5	0.581658				552.5	0.984703				552.5	0.304085
	553.2	0.386793			553.2	0.581145				553.2	0.578612				553.2	0.982506				553.2	0.303401
	553.9	0.382556			553.9	0.570957				553.9	0.574112				553.9	0.978623				553.9	0.302122
	554.7	0.378416			554.7	0.561987				554.7	0.56928				554.7	0.974097				554.7	0.300349
	555.4	0.37512			555.4	0.553248				555.4	0.565567				555.4	0.967748				555.4	0.298476
	556.1	0.371039			556.1	0.545121				556.1	0.560907				556.1	0.959913				556.1	0.295981
	556.8	0.368628			556.8	0.537298				556.8	0.557248				556.8	0.954312				556.8	0.294497
	557.6	0.365632			557.6	0.529092				557.6	0.552449				557.6	0.946721				557.6	0.293016
	558.3	0.364207			558.3	0.521462				558.3	0.549487				558.3	0.940228				558.3	0.292049
	559	0.361342			559	0.514908				559	0.546177				559	0.931639				559	0.290327
	559.7	0.360192			559.7	0.509278				559.7	0.543398				559.7	0.92545				559.7	0.288425
	560.5	0.358239			560.5	0.503285				560.5	0.539906				560.5	0.920066				560.5	0.287064
	561.2	0.357419			561.2	0.498353				561.2	0.53663				561.2	0.914953				561.2	0.285948
	561.9	0.35584			561.9	0.493668				561.9	0.534278				561.9	0.909812				561.9	0.285554
	562.7	0.354906			562.7	0.489845				562.7	0.532474				562.7	0.903624				562.7	0.284686
	563.4	0.353617			563.4	0.48622				563.4	0.530928				563.4	0.898668				563.4	0.28417
	564.1	0.352285			564.1	0.483289				564.1	0.528621				564.1	0.892575				564.1	0.2833
	564.8	0.35126			564.8	0.480801				564.8	0.526655				564.8	0.887159				564.8	0.282569
	565.6	0.350021			565.6	0.478754				565.6	0.524955				565.6	0.882828				565.6	0.281803
	566.3	0.34923			566.3	0.477605				566.3	0.524324				566.3	0.879771				566.3	0.280843
	567	0.347612			567	0.476349				567	0.524454				567	0.879259				567	0.279925
	567.7	0.347296			567.7	0.474818				567.7	0.523765				567.7	0.877363				567.7	0.278973
	568.5	0.346134			568.5	0.473282				568.5	0.522725				568.5	0.875198				568.5	0.278264
	569.2	0.345868			569.2	0.473375				569.2	0.521382				569.2	0.872077				569.2	0.278039
	569.9	0.344692			569.9	0.473148				569.9	0.521373				569.9	0.871981				569.9	0.277411
	570.7	0.344242			570.7	0.47352				570.7	0.520591				570.7	0.871296				570.7	0.277114
	571.4	0.343926			571.4	0.473748				571.4	0.519806				571.4	0.872375				571.4	0.27646
	572.1	0.342702			572.1	0.474904				572.1	0.518329				572.1	0.872083				572.1	0.275967
	572.8	0.34154			572.8	0.475916				572.8	0.518087				572.8	0.872559				572.8	0.275088
	573.6	0.34009			573.6	0.47594				573.6	0.517046				573.6	0.872232				573.6	0.274125
	574.3	0.339721			574.3	0.475877				574.3	0.51606				574.3	0.871342				574.3	0.27345
	575	0.338734			575	0.476511				575	0.515502				575	0.872215				575	0.27221
	575.7	0.337773			575.7	0.478293				575.7	0.513967				575.7	0.871858				575.7	0.27138
	576.5	0.33707			576.5	0.479273				576.5	0.513142				576.5	0.87131				576.5	0.269866
	577.2	0.33637			577.2	0.479759				577.2	0.511391				577.2	0.870759				577.2	0.26942
	577.9	0.33568			577.9	0.480177				577.9	0.510271				577.9	0.870608				577.9	0.268405
	578.7	0.33389			578.7	0.481097				578.7	0.508162				578.7	0.870753				578.7	0.267826
	579.4	0.332303			579.4	0.481968				579.4	0.506239				579.4	0.869689				579.4	0.267094
	580.1	0.329929			580.1	0.482495				580.1	0.503883				580.1	0.86789				580.1	0.266113
	580.8	0.328226			580.8	0.483155				580.8	0.502529				580.8	0.865786				580.8	0.265489
	581.6	0.326683			581.6	0.482805				581.6	0.500153				581.6	0.864378				581.6	0.264036
	582.3	0.324745			582.3	0.482788				582.3	0.497754				582.3	0.860675				582.3	0.262061
	583	0.323089			583	0.482459				583	0.49452				583	0.858165				583	0.259854
	583.7	0.321394			583.7	0.483163				583.7	0.491748				583.7	0.852641				583.7	0.258193
	584.5	0.319876			584.5	0.483044				584.5	0.489146				584.5	0.849255				584.5	0.2564
	585.2	0.318244			585.2	0.482468				585.2	0.48642				585.2	0.844861				585.2	0.25468
	585.9	0.31519			585.9	0.481562				585.9	0.482697				585.9	0.841582				585.9	0.252669
	586.7	0.313478			586.7	0.481505				586.7	0.478895				586.7	0.837465				586.7	0.251578
	587.4	0.311122			587.4	0.481037				587.4	0.475655				587.4	0.832512				587.4	0.250907
	588.1	0.30998			588.1	0.480121				588.1	0.472296				588.1	0.827983				588.1	0.249483
	588.8	0.308572			588.8	0.47972				588.8	0.469654				588.8	0.82432				588.8	0.247977
	589.6	0.306854			589.6	0.479329				589.6	0.463922				589.6	0.819563				589.6	0.245881
	590.3	0.30527			590.3	0.479563				590.3	0.459226				590.3	0.814353				590.3	0.244438
	591	0.303052			591	0.478447				591	0.452466				591	0.807188				591	0.242353
	591.7	0.300921			591.7	0.478205				591.7	0.447162				591.7	0.799185				591.7	0.240067
	592.5	0.298809			592.5	0.478323				592.5	0.440176				592.5	0.790635				592.5	0.237119
	593.2	0.297348			593.2	0.477912				593.2	0.433857				593.2	0.78287				593.2	0.234975
	593.9	0.296233			593.9	0.477037				593.9	0.426463				593.9	0.77446				593.9	0.232493
	594.6	0.295502			594.6	0.475207				594.6	0.419508				594.6	0.76482				594.6	0.231652
	595.3	0.293922			595.3	0.473844				595.3	0.411975				595.3	0.75354				595.3	0.229721
	596.1	0.292688			596.1	0.473485				596.1	0.404606				596.1	0.740109				596.1	0.227953
	596.8	0.292023			596.8	0.472687				596.8	0.396556				596.8	0.724335				596.8	0.225006
	597.5	0.291475			597.5	0.471588				597.5	0.387604				597.5	0.707218				597.5	0.222491
	598.2	0.291112			598.2	0.469257				598.2	0.379126				598.2	0.69002				598.2	0.22022
	599	0.290443			599	0.466911				599	0.369805				599	0.67364				599	0.21775
	599.7	0.289928			599.7	0.464859				599.7	0.36122				599.7	0.655253				599.7	0.215657
	600.4	0.289695			600.4	0.462548				600.4	0.352601				600.4	0.63666				600.4	0.213409
	601.1	0.288571			601.1	0.460014				601.1	0.343959				601.1	0.616634				601.1	0.210614
	601.9	0.287541			601.9	0.457173				601.9	0.336096				601.9	0.59778				601.9	0.207401
	602.6	0.286409			602.6	0.455191				602.6	0.328393				602.6	0.579886				602.6	0.203823
	603.3	0.286138			603.3	0.452902				603.3	0.321974				603.3	0.562492				603.3	0.200912
	604	0.286691			604	0.451006				604	0.316272				604	0.546665				604	0.199786
	604.8	0.287762			604.8	0.448818				604.8	0.308467				604.8	0.528035				604.8	0.197884
	605.5	0.288825			605.5	0.447155				605.5	0.301297				605.5	0.510531				605.5	0.19706
	606.2	0.290218			606.2	0.445627				606.2	0.292651				606.2	0.491729				606.2	0.195406
	606.9	0.289623			606.9	0.443614				606.9	0.285918				606.9	0.474531				606.9	0.194238
	607.7	0.289259			607.7	0.441054				607.7	0.278933				607.7	0.457917				607.7	0.191965
	608.4	0.289145			608.4	0.437374				608.4	0.272202				608.4	0.441197				608.4	0.188693
	609.1	0.289871			609.1	0.433875				609.1	0.265607				609.1	0.425485				609.1	0.185886
	609.8	0.292029			609.8	0.431399				609.8	0.258707				609.8	0.408538				609.8	0.182993
	610.5	0.293587			610.5	0.429641				610.5	0.252133				610.5	0.39313				610.5	0.181581
	611.3	0.295789			611.3	0.427963				611.3	0.246304				611.3	0.378646				611.3	0.181284
	612	0.296242			612	0.425465				612	0.240453				612	0.364896				612	0.179761
	612.7	0.296764			612.7	0.422233				612.7	0.235471				612.7	0.352372				612.7	0.177625
	613.4	0.297879			613.4	0.419318				613.4	0.230485				613.4	0.339678				613.4	0.174269
	614.2	0.299309			614.2	0.417913				614.2	0.226278				614.2	0.328833				614.2	0.172951
	614.9	0.301327			614.9	0.417119				614.9	0.222263				614.9	0.31741				614.9	0.171406
	615.6	0.30296			615.6	0.416029				615.6	0.217109				615.6	0.306052				615.6	0.169633
	616.3	0.305343			616.3	0.414929				616.3	0.212285				616.3	0.295321				616.3	0.167986
	617.1	0.307836			617.1	0.413413				617.1	0.207332				617.1	0.285676				617.1	0.166166
	617.8	0.310308			617.8	0.412589				617.8	0.203341				617.8	0.276827				617.8	0.165315
	618.5	0.312319			618.5	0.411191				618.5	0.199455				618.5	0.267905				618.5	0.163755
	619.2	0.313678			619.2	0.411312				619.2	0.195274				619.2	0.25925				619.2	0.162301
	620	0.315612			620	0.410109				620	0.191346				620	0.250854				620	0.159815
	620.7	0.316794			620.7	0.409839				620.7	0.187188				620.7	0.242519				620.7	0.158075
	621.4	0.318443			621.4	0.409088				621.4	0.183576				621.4	0.235322				621.4	0.156593
	622.1	0.319588			622.1	0.408908				622.1	0.179815				622.1	0.227974				622.1	0.155845
	622.9	0.321701			622.9	0.408397				622.9	0.176975				622.9	0.221962				622.9	0.15552
	623.6	0.323532			623.6	0.407986				623.6	0.173917				623.6	0.214732				623.6	0.153944
	624.3	0.325227			624.3	0.4093				624.3	0.172057				624.3	0.20964				624.3	0.153454
	625	0.326803			625	0.409245				625	0.168665				625	0.203423				625	0.151686
	625.7	0.327913			625.7	0.40937				625.7	0.166404				625.7	0.19949				625.7	0.151612
	626.5	0.327949			626.5	0.406771				626.5	0.162917				626.5	0.193628				626.5	0.1498
	627.2	0.327523			627.2	0.405101				627.2	0.160897				627.2	0.188973				627.2	0.148511
	627.9	0.327198			627.9	0.403678				627.9	0.158754				627.9	0.183577				627.9	0.147232
	628.6	0.328128			628.6	0.402747				628.6	0.157559				628.6	0.179846				628.6	0.146513
	629.4	0.328334			629.4	0.401896				629.4	0.155915				629.4	0.176528				629.4	0.147261
	630.1	0.327835			630.1	0.3996				630.1	0.154104				630.1	0.172547				630.1	0.146032
	630.8	0.327121			630.8	0.397933				630.8	0.152459				630.8	0.169968				630.8	0.146325
	631.5	0.325565			631.5	0.395506				631.5	0.150747				631.5	0.16633				631.5	0.144489
	632.3	0.324407			632.3	0.393505				632.3	0.148823				632.3	0.163778				632.3	0.144223
	633	0.322546			633	0.390968				633	0.146885				633	0.160389				633	0.142921
	633.7	0.320268			633.7	0.387869				633.7	0.144934				633.7	0.156827				633.7	0.141375
	634.4	0.31771			634.4	0.384977				634.4	0.143999				634.4	0.15417				634.4	0.140907
	635.2	0.314217			635.2	0.381234				635.2	0.141736				635.2	0.150155				635.2	0.138794
	635.9	0.310577			635.9	0.377418				635.9	0.140252				635.9	0.148195				635.9	0.138586
	636.6	0.306147			636.6	0.372681				636.6	0.137786				636.6	0.144731				636.6	0.136784
	637.3	0.301629			637.3	0.368738				637.3	0.136845				637.3	0.143212				637.3	0.13685
	638.1	0.297713			638.1	0.364422				638.1	0.135551				638.1	0.140685				638.1	0.136023
	638.8	0.292447			638.8	0.359227				638.8	0.134627				638.8	0.139124				638.8	0.135644
	639.5	0.287108			639.5	0.353613				639.5	0.133136				639.5	0.136567				639.5	0.134958
	640.2	0.281049			640.2	0.347454				640.2	0.131372				640.2	0.134366				640.2	0.133835
	640.9	0.275438			640.9	0.341942				640.9	0.129863				640.9	0.13209				640.9	0.132975
	641.7	0.269247			641.7	0.336172				641.7	0.128704				641.7	0.130068				641.7	0.131736
	642.4	0.261952			642.4	0.330645				642.4	0.126994				642.4	0.12786				642.4	0.130957
	643.1	0.254661			643.1	0.325252				643.1	0.125446				643.1	0.126043				643.1	0.130253
	643.8	0.246952			643.8	0.319687				643.8	0.123891				643.8	0.124584				643.8	0.129877
	644.6	0.240061			644.6	0.314069				644.6	0.123548				644.6	0.123552				644.6	0.129357
	645.3	0.233275			645.3	0.307935				645.3	0.121995				645.3	0.122283				645.3	0.129102
	646	0.226699			646	0.301694				646	0.120255				646	0.120755				646	0.128056
	646.7	0.220498			646.7	0.296111				646.7	0.119142				646.7	0.11984				646.7	0.127489
	647.5	0.214143			647.5	0.289912				647.5	0.118654				647.5	0.118064				647.5	0.125907
	648.2	0.207594			648.2	0.283998				648.2	0.117652				648.2	0.116596				648.2	0.12515
	648.9	0.201146			648.9	0.277456				648.9	0.116478				648.9	0.114866				648.9	0.12461
	649.6	0.195102			649.6	0.270879				649.6	0.114608				649.6	0.113959				649.6	0.124294
	650.4	0.189752			650.4	0.263593				650.4	0.114366				650.4	0.113638				650.4	0.123891
	651.1	0.183935			651.1	0.2562				651.1	0.113084				651.1	0.112366				651.1	0.123153
	651.8	0.178356			651.8	0.248991				651.8	0.113276				651.8	0.111913				651.8	0.122966
	652.5	0.172835			652.5	0.241716				652.5	0.112184				652.5	0.109893				652.5	0.122548
	653.3	0.168088			653.3	0.234232				653.3	0.112035				653.3	0.10955				653.3	0.123158
	654	0.163532			654	0.226637				654	0.110796				654	0.107625				654	0.122091
	654.7	0.159295			654.7	0.218888				654.7	0.110113				654.7	0.106944				654.7	0.122311
	655.4	0.155242			655.4	0.211502				655.4	0.109527				655.4	0.105352				655.4	0.120567
	656.1	0.151195			656.1	0.203678				656.1	0.108105				656.1	0.104729				656.1	0.120672
	656.9	0.147695			656.9	0.196188				656.9	0.107143				656.9	0.103866				656.9	0.119762
	657.6	0.14414			657.6	0.188266				657.6	0.105424				657.6	0.102298				657.6	0.118746
	658.3	0.140547			658.3	0.181152				658.3	0.105471				658.3	0.101036				658.3	0.118204
	659	0.136706			659	0.174027				659	0.104085				659	0.0990665				659	0.116478
	659.8	0.133256			659.8	0.167703				659.8	0.102809				659.8	0.0979979				659.8	0.11608
	660.5	0.130461			660.5	0.161626				660.5	0.101269				660.5	0.0962417				660.5	0.114715
	661.2	0.127683			661.2	0.155954				661.2	0.100418				661.2	0.0956119				661.2	0.114664
	661.9	0.124869			661.9	0.150326				661.9	0.0996642				661.9	0.0940001				661.9	0.113819
	662.7	0.122073			662.7	0.145105				662.7	0.0988921				662.7	0.0933766				662.7	0.11398
	663.4	0.119961			663.4	0.140059				663.4	0.0979389				663.4	0.0916115				663.4	0.113123
	664.1	0.118267			664.1	0.135487				664.1	0.0968042				664.1	0.0912978				664.1	0.113062
	664.8	0.116564			664.8	0.131058				664.8	0.0958243				664.8	0.0903569				664.8	0.112357
	665.6	0.114501			665.6	0.126395				665.6	0.0941021				665.6	0.0890366				665.6	0.111268
	666.3	0.112527			666.3	0.122843				666.3	0.0941231				666.3	0.0885791				666.3	0.111469
	667	0.110604			667	0.118411				667	0.0921175				667	0.0862456				667	0.109255
	667.8	0.109506			667.8	0.116389				667.8	0.0931864				667.8	0.0873452				667.8	0.111163
	668.5	0.107599			668.5	0.112435				668.5	0.0910202				668.5	0.0854061				668.5	0.108907
	669.2	0.106393			669.2	0.109914				669.2	0.0909427				669.2	0.0860591				669.2	0.109799
	669.9	0.104825			669.9	0.10594				669.9	0.0892205				669.9	0.0841741				669.9	0.107803
	670.7	0.104161			670.7	0.103146				670.7	0.0887235				670.7	0.0834746				670.7	0.107693
	671.4	0.102895			671.4	0.100365				671.4	0.088436				671.4	0.082971				671.4	0.106981
	672.1	0.101457			672.1	0.0971622				672.1	0.0866607				672.1	0.0813892				672.1	0.105489
	672.9	0.100141			672.9	0.0950766				672.9	0.0864554				672.9	0.0813752				672.9	0.105566
	673.6	0.0989521			673.6	0.0926601				673.6	0.0852995				673.6	0.0796085				673.6	0.104251
	674.3	0.0986258			674.3	0.091584				674.3	0.0857023				674.3	0.0802441				674.3	0.105207
	675	0.0979723			675	0.0893478				675	0.0851				675	0.0792309				675	0.104059
	675.8	0.0973385			675.8	0.0874887				675.8	0.0843087				675.8	0.079007				675.8	0.104557
	676.5	0.0959094			676.5	0.0857604				676.5	0.0840197				676.5	0.0787026				676.5	0.103914
	677.2	0.0946267			677.2	0.0832407				677.2	0.0819929				677.2	0.0772424				677.2	0.102731
	678	0.0937356			678	0.082409				678	0.0826414				678	0.0780029				678	0.103269
	678.7	0.0929474			678.7	0.0801025				678.7	0.080357				678.7	0.0753791				678.7	0.10074
	679.4	0.0927817			679.4	0.0802013				679.4	0.0811594				679.4	0.0761992				679.4	0.102721
	680.1	0.0919899			680.1	0.0787353				680.1	0.0793843				680.1	0.0745614				680.1	0.100894
	680.9	0.0916009			680.9	0.0781672				680.9	0.0790114				680.9	0.0750772				680.9	0.102277
	681.6	0.0907783			681.6	0.0769235				681.6	0.0790093				681.6	0.0746632				681.6	0.101197
	682.3	0.0901379			682.3	0.0748945				682.3	0.077949				682.3	0.0729061				682.3	0.100292
	683.1	0.0898038			683.1	0.0743976				683.1	0.0786986				683.1	0.0728895				683.1	0.10026
	683.8	0.0893547			683.8	0.0729808				683.8	0.0771371				683.8	0.071642				683.8	0.099038
	684.5	0.0892429			684.5	0.0730977				684.5	0.0769893				684.5	0.0721564				684.5	0.0987542
	685.2	0.0885134			685.2	0.0716956				685.2	0.0763794				685.2	0.0712983				685.2	0.0980667
	686	0.0878372			686	0.0707153				686	0.075109				686	0.0704912				686	0.0976686
	686.7	0.0870686			686.7	0.0701675				686.7	0.0754478				686.7	0.0707172				686.7	0.098395
	687.4	0.0869313			687.4	0.0690979				687.4	0.0740939				687.4	0.0692085				687.4	0.0970823
	688.2	0.0866538			688.2	0.0691152				688.2	0.0748415				688.2	0.0693013				688.2	0.0980273
	688.9	0.086625			688.9	0.0681598				688.9	0.0735013				688.9	0.0676721				688.9	0.0963669
	689.6	0.0857477			689.6	0.0679802				689.6	0.0722046				689.6	0.0675253				689.6	0.096732
	690.3	0.0850859			690.3	0.068028				690.3	0.0716829				690.3	0.067729				690.3	0.0960686
	691.1	0.0850098			691.1	0.0677095				691.1	0.0700286				691.1	0.0667184				691.1	0.0962126
	691.8	0.0849957			691.8	0.0684747				691.8	0.071718				691.8	0.0683051				691.8	0.0973335
	692.5	0.0847845			692.5	0.0669355				692.5	0.0696393				692.5	0.065976				692.5	0.0952609
	693.3	0.0843026			693.3	0.0668583				693.3	0.0701243				693.3	0.0667732				693.3	0.0957494
	694	0.0839763			694	0.0656579				694	0.0686923				694	0.0653256				694	0.0942737
	694.7	0.0839469			694.7	0.0654867				694.7	0.0679981				694.7	0.0649052				694.7	0.0941921
	695.4	0.0833967			695.4	0.0657984				695.4	0.0684264				695.4	0.065385				695.4	0.0946525
	696.2	0.0832345			696.2	0.0651997				696.2	0.0668012				696.2	0.0637761				696.2	0.0928357
	696.9	0.0828575			696.9	0.0659619				696.9	0.0674932				696.9	0.0648929				696.9	0.0942008
	697.6	0.0827976			697.6	0.065545				697.6	0.0669066				697.6	0.0637401				697.6	0.0929931
	698.4	0.0824844			698.4	0.0659168				698.4	0.0668391				698.4	0.0641665				698.4	0.0937886
	699.1	0.0825157			699.1	0.0665103				699.1	0.0677748				699.1	0.0651764				699.1	0.0940014
	699.8	0.0821819			699.8	0.0655509				699.8	0.0664723				699.8	0.0639442				699.8	0.0924731
	700.5	0.0820862			700.5	0.0663606				700.5	0.0672852				700.5	0.0645892				700.5	0.0933845
	701.3	0.0813805			701.3	0.0656618				701.3	0.0663473				701.3	0.0632174				701.3	0.0918005
	702	0.0810117			702	0.0656441				702	0.06549				702	0.0630188				702	0.0920961
	702.7	0.0806344			702.7	0.0656438				702.7	0.065934				702.7	0.0638378				702.7	0.0923392
	703.5	0.0805612			703.5	0.0643455				703.5	0.0642109				703.5	0.0617175				703.5	0.0908989
	704.2	0.0807924			704.2	0.0654145				704.2	0.0656077				704.2	0.0634798				704.2	0.0922543
	704.9	0.0804221			704.9	0.064636				704.9	0.0644702				704.9	0.0623069				704.9	0.0903261
	705.6	0.0801299			705.6	0.064619				705.6	0.0641999				705.6	0.0629949				705.6	0.0906407
	706.4	0.0795935			706.4	0.0644744				706.4	0.0641924				706.4	0.063255				706.4	0.0904222
	707.1	0.0796847			707.1	0.0640501				707.1	0.0635353				707.1	0.0619634				707.1	0.0894523
	707.8	0.0796818			707.8	0.064695				707.8	0.0643419				707.8	0.0629158				707.8	0.0905363
	708.6	0.0796324			708.6	0.0648149				708.6	0.064097				708.6	0.0622083				708.6	0.0898998
	709.3	0.0794973			709.3	0.0644539				709.3	0.0633251				709.3	0.0628591				709.3	0.0902469
	710	0.0794728			710	0.0652236				710	0.064172				710	0.0636604				710	0.0904096
	710.7	0.0791731			710.7	0.0640202				710.7	0.0623791				710.7	0.0627492				710.7	0.088926
	711.4	0.0790808			711.4	0.0645925				711.4	0.0633975				711.4	0.0632602				711.4	0.089417
	712.2	0.0790132			712.2	0.0643403				712.2	0.0625198				712.2	0.0627114				712.2	0.0888946
	712.9	0.0792214			712.9	0.064392				712.9	0.0624642				712.9	0.0626732				712.9	0.0887784
	713.6	0.0789576			713.6	0.0649905				713.6	0.0624354				713.6	0.062975				713.6	0.0894348
	714.3	0.0790267			714.3	0.0634344				714.3	0.0605607				714.3	0.0614057				714.3	0.0869402
	715.1	0.0784508			715.1	0.0639966				715.1	0.0614924				715.1	0.0617173				715.1	0.0881053
	715.8	0.0786385			715.8	0.0634017				715.8	0.0610574				715.8	0.0612687				715.8	0.0871626
	716.5	0.0786663			716.5	0.0638465				716.5	0.0609074				716.5	0.0610971				716.5	0.0873386
	717.2	0.0790371			717.2	0.0643287				717.2	0.0611024				717.2	0.062124				717.2	0.0869911
	717.9	0.0784193			717.9	0.0640351				717.9	0.0607547				717.9	0.0617879				717.9	0.0859199
	718.7	0.0775379			718.7	0.0632731				718.7	0.0603172				718.7	0.0618868				718.7	0.0857001
	719.4	0.0770742			719.4	0.0634251				719.4	0.06055				719.4	0.062516				719.4	0.0863809
	720.1	0.076856			720.1	0.062358				720.1	0.0589617				720.1	0.0606315				720.1	0.0848095
	720.8	0.0772902			720.8	0.0641189				720.8	0.0604816				720.8	0.062672				720.8	0.0867816
	721.6	0.0774758			721.6	0.0633555				721.6	0.0596254				721.6	0.0613111				721.6	0.0849983
	722.3	0.0772977			722.3	0.0638639				722.3	0.0599564				722.3	0.0627126				722.3	0.0856606
	723	0.0766867			723	0.0634903				723	0.0594834				723	0.062056				723	0.0845567
	723.7	0.0762184			723.7	0.0634427				723.7	0.0586909				723.7	0.0618158				723.7	0.0838841
	724.4	0.0758121			724.4	0.063826				724.4	0.0586174				724.4	0.061908				724.4	0.0838948
	725.2	0.0754752			725.2	0.0637454				725.2	0.0587147				725.2	0.0625612				725.2	0.0835915
	725.9	0.0752952			725.9	0.0628008				725.9	0.0581847				725.9	0.0621749				725.9	0.0825146
	726.6	0.0760107			726.6	0.0638653				726.6	0.0591417				726.6	0.0635612				726.6	0.0837402
	727.3	0.0756144			727.3	0.0638034				727.3	0.0586568				727.3	0.0627215				727.3	0.0830905
	728.1	0.0752458			728.1	0.0642116				728.1	0.0584472				728.1	0.0626421				728.1	0.0833365
	728.8	0.0745773			728.8	0.0637146				728.8	0.0587531				728.8	0.0629859				728.8	0.0829133
	729.5	0.0750464			729.5	0.0639364				729.5	0.0588759				729.5	0.0629859				729.5	0.0824906
	730.2	0.0752862			730.2	0.0639161				730.2	0.0582543				730.2	0.0629443				730.2	0.0825613
	731	0.0751262			731	0.0644608				731	0.0579318				731	0.0635267				731	0.082611
	731.7	0.0750932			731.7	0.063634				731.7	0.0572417				731.7	0.0630898				731.7	0.0821334
	732.4	0.0749631			732.4	0.0646615				732.4	0.0588843				732.4	0.0644545				732.4	0.0829902
	733.1	0.0746323			733.1	0.0641891				733.1	0.0580537				733.1	0.0635411				733.1	0.0818282
	733.8	0.074838			733.8	0.0651869				733.8	0.0583618				733.8	0.0643748				733.8	0.0822759
	734.6	0.0745664			734.6	0.0648743				734.6	0.0575884				734.6	0.0639634				734.6	0.0814597
	735.3	0.0745246			735.3	0.0653325				735.3	0.0574878				735.3	0.0635286				735.3	0.0815679
	736	0.0739101			736	0.0653876				736	0.0573772				736	0.0630246				736	0.0810472
	736.7	0.0739827			736.7	0.0661106				736.7	0.0574942				736.7	0.0635181				736.7	0.0812586
	737.5	0.0743851			737.5	0.0655204				737.5	0.056848				737.5	0.0627775				737.5	0.0802244
	738.2	0.0747227			738.2	0.0657634				738.2	0.0572958				738.2	0.0634104				738.2	0.0811533
	738.9	0.0743822			738.9	0.0652784				738.9	0.0564057				738.9	0.0629085				738.9	0.0801459
	739.6	0.0743538			739.6	0.0656616				739.6	0.0561522				739.6	0.0634458				739.6	0.0803297
	740.3	0.0744873			740.3	0.066007				740.3	0.055636				740.3	0.0632108				740.3	0.0796384
	741.1	0.074614			741.1	0.0655855				741.1	0.0555468				741.1	0.0621838				741.1	0.0791051
	741.8	0.0743909			741.8	0.0648995				741.8	0.0545879				741.8	0.0610594				741.8	0.0779026
	742.5	0.073911			742.5	0.0651059				742.5	0.0546107				742.5	0.0611499				742.5	0.0785134
	743.2	0.0741234			743.2	0.0647805				743.2	0.0533653				743.2	0.0604126				743.2	0.0780172
	744	0.074193			744	0.0654166				744	0.0544243				744	0.0610653				744	0.0790916
	744.7	0.0743766			744.7	0.064853				744.7	0.0531784				744.7	0.0608404				744.7	0.0782143
	745.4	0.0740016			745.4	0.0655522				745.4	0.0539795				745.4	0.0614938				745.4	0.0790173
	746.1	0.0746372			746.1	0.064374				746.1	0.0519314				746.1	0.0598535				746.1	0.0775592
	746.8	0.0746601			746.8	0.0644159				746.8	0.0522308				746.8	0.0591866				746.8	0.0777461
	747.6	0.0745474			747.6	0.0640914				747.6	0.0505845				747.6	0.0574571				747.6	0.0763322
	748.3	0.0744755			748.3	0.0654516				748.3	0.0516785				748.3	0.0585693				748.3	0.0780031
	749	0.0743523			749	0.0653785				749	0.0507442				749	0.057948				749	0.0770955
	749.7	0.0747616			749.7	0.0658482				749.7	0.051606				749.7	0.0588966				749.7	0.0782567
	750.5	0.0740575			750.5	0.0651543				750.5	0.0509471				750.5	0.0578882				750.5	0.0771583
	751.2	0.0739834			751.2	0.0655412				751.2	0.0510077				751.2	0.057984				751.2	0.0774298
	751.9	0.0740407			751.9	0.0655265				751.9	0.0505238				751.9	0.0573375				751.9	0.0768469
	752.6	0.0745085			752.6	0.0665461				752.6	0.0504305				752.6	0.0569548				752.6	0.0768327
	753.3	0.0743605			753.3	0.0661339				753.3	0.0495871				753.3	0.0555837				753.3	0.075746
	754.1	0.0741563			754.1	0.0666493				754.1	0.0492963				754.1	0.0557949				754.1	0.0756535
	754.8	0.074434			754.8	0.0668507				754.8	0.0487715				754.8	0.0552166				754.8	0.0750872
	755.5	0.0741658			755.5	0.0672025				755.5	0.0486152				755.5	0.0552877				755.5	0.0756277
	756.2	0.0740331			756.2	0.0673991				756.2	0.0486186				756.2	0.0549119				756.2	0.0755336
	757	0.073429			757	0.0676694				757	0.0490856				757	0.0550166				757	0.0762539
	757.7	0.0737864			757.7	0.0682044				757.7	0.048835				757.7	0.0545562				757.7	0.0751137
	758.4	0.0738342			758.4	0.0685836				758.4	0.0489803				758.4	0.0543572				758.4	0.0753536
	759.1	0.0735916			759.1	0.0683556				759.1	0.0479304				759.1	0.0536006				759.1	0.0742055
	759.8	0.0734011			759.8	0.0687044				759.8	0.0483126				759.8	0.0535541				759.8	0.0751477
	760.6	0.0738139			760.6	0.0693099				760.6	0.0484266				760.6	0.0534187				760.6	0.0747924
	761.3	0.074541			761.3	0.0696223				761.3	0.0486813				761.3	0.0539042				761.3	0.0755342
	762	0.0751858			762	0.0700927				762	0.0485132				762	0.0539172				762	0.075651
	762.7	0.0745983			762.7	0.0700583				762.7	0.0477028				762.7	0.0527352				762.7	0.0754307
	763.5	0.074479			763.5	0.0703024				763.5	0.0475668				763.5	0.0518791				763.5	0.0748205
	764.2	0.0742314			764.2	0.0695475				764.2	0.0469474				764.2	0.0509236				764.2	0.0743913
	764.9	0.074711			764.9	0.06928				764.9	0.047381				764.9	0.0509366				764.9	0.0747145
	765.6	0.0742581			765.6	0.0687974				765.6	0.0470822				765.6	0.050206				765.6	0.0738477
	766.3	0.0749053			766.3	0.0696804				766.3	0.0480337				766.3	0.0505387				766.3	0.074514
	767.1	0.0749539			767.1	0.0696838				767.1	0.0472615				767.1	0.0503337				767.1	0.0735486
	767.8	0.0753931			767.8	0.0708191				767.8	0.0472634				767.8	0.0504955				767.8	0.0741528
	768.5	0.0749316			768.5	0.07101				768.5	0.0458951				768.5	0.0493206				768.5	0.0722295
	769.2	0.0748132			769.2	0.0716635				769.2	0.0462902				769.2	0.0495246				769.2	0.072787
	770	0.0746911			770	0.071096				770	0.0453061				770	0.0485442				770	0.0722603
	770.7	0.07455			770.7	0.0717512				770.7	0.0460703				770.7	0.0491291				770.7	0.0739884
	771.4	0.0752067			771.4	0.0711794				771.4	0.0446993				771.4	0.0472547				771.4	0.0728346
	772.1	0.0753281			772.1	0.0725313				772.1	0.0456823				772.1	0.0482389				772.1	0.0739275
	772.8	0.0754689			772.8	0.0718468				772.8	0.0442236				772.8	0.0466948				772.8	0.0718857
	773.6	0.0753997			773.6	0.0722841				773.6	0.0445457				773.6	0.0473161				773.6	0.0726924
	774.3	0.0752538			774.3	0.0716623				774.3	0.0433881				774.3	0.0456405				774.3	0.070917
	775	0.07628			775	0.0723295				775	0.0434815				775	0.0459668				775	0.0714802
	775.7	0.0764725			775.7	0.0719908				775.7	0.0427032				775.7	0.0445943				775.7	0.0699398
	776.5	0.0775698			776.5	0.0726257				776.5	0.0424629				776.5	0.0449461				776.5	0.0712875
	777.2	0.0767512			777.2	0.0729741				777.2	0.042737				777.2	0.0450834				777.2	0.0717494
	777.9	0.0768062			777.9	0.0731332				777.9	0.0421445				777.9	0.0444813				777.9	0.0719017
	778.6	0.0762276			778.6	0.0728911				778.6	0.0426522				778.6	0.0437405				778.6	0.0713606
	779.4	0.0764851			779.4	0.0732215				779.4	0.0423239				779.4	0.0429002				779.4	0.0704718
	780.1	0.0760974			780.1	0.073856				780.1	0.0424314				780.1	0.0428888				780.1	0.0702185
	780.8	0.0763061			780.8	0.0736245				780.8	0.0407944				780.8	0.0419303				780.8	0.0691886
	781.5	0.0765743			781.5	0.0740271				781.5	0.04121				781.5	0.0423804				781.5	0.0701667
	782.2	0.0767749			782.2	0.0741112				782.2	0.0415037				782.2	0.0424269				782.2	0.0703219
	783	0.0767855			783	0.0749833				783	0.0424171				783	0.0435656				783	0.0709041
	783.7	0.0766849			783.7	0.0741632				783.7	0.0406919				783.7	0.0421368				783.7	0.0691728
	784.4	0.076642			784.4	0.0754316				784.4	0.0408093				784.4	0.042609				784.4	0.0694758
	785.1	0.0770687			785.1	0.0753378				785.1	0.0401111				785.1	0.0411244				785.1	0.0688618
	785.9	0.0774124			785.9	0.0767745				785.9	0.0409258				785.9	0.0420934				785.9	0.0701682
	786.6	0.0773231			786.6	0.076579				786.6	0.0397779				786.6	0.0411484				786.6	0.0696113
	787.3	0.0773705			787.3	0.0777068				787.3	0.04019				787.3	0.0420016				787.3	0.0707052
	788	0.0769782			788	0.0775979				788	0.0400486				788	0.0414188				788	0.0700189
	788.7	0.0774753			788.7	0.077998				788.7	0.0407279				788.7	0.0416644				788.7	0.0702167
	789.5	0.0770112			789.5	0.0781264				789.5	0.0404507				789.5	0.0410309				789.5	0.0689502
	790.2	0.0778165			790.2	0.0786565				790.2	0.0398465				790.2	0.0404685				790.2	0.0690566
	790.9	0.0775526			790.9	0.0792179				790.9	0.0398717				790.9	0.0406855				790.9	0.0690522
	791.6	0.0781042			791.6	0.0792225				791.6	0.0389052				791.6	0.0399565				791.6	0.0687951
	792.4	0.0776378			792.4	0.0801222				792.4	0.0401901				792.4	0.0414219				792.4	0.069985
	793.1	0.0782367			793.1	0.080309				793.1	0.039856				793.1	0.0407486				793.1	0.0696879
	793.8	0.077952			793.8	0.0811482				793.8	0.0405591				793.8	0.041478				793.8	0.0700107
	794.5	0.0782046			794.5	0.0805905				794.5	0.0388182				794.5	0.0391774				794.5	0.0677861
	795.2	0.0778892			795.2	0.081094				795.2	0.0391908				795.2	0.0395563				795.2	0.068489
	796	0.0781054			796	0.0802777				796	0.0385947				796	0.0380742				796	0.0672663
	796.7	0.0776648			796.7	0.0812543				796.7	0.0389555				796.7	0.0391659				796.7	0.0682756
	797.4	0.0776309			797.4	0.0813514				797.4	0.0384768				797.4	0.0383078				797.4	0.0674347
	798.1	0.0774193			798.1	0.0823071				798.1	0.0385729				798.1	0.0387909				798.1	0.0682223
	798.9	0.0779909			798.9	0.0827613				798.9	0.0386782				798.9	0.0386079				798.9	0.067959
	799.6	0.0777704			799.6	0.0834053				799.6	0.0381903				799.6	0.0388947				799.6	0.0678748
	800.3	0.0778705			800.3	0.0838884				800.3	0.0380869				800.3	0.038519				800.3	0.0666527
	801	0.0771721			801	0.0833272				801	0.0364042				801	0.0367586				801	0.0650135
	801.7	0.077236			801.7	0.0839504				801.7	0.0372414				801.7	0.0372234				801.7	0.0654104
	802.5	0.077422			802.5	0.0840675				802.5	0.0360783				802.5	0.0369423				802.5	0.0657656
	803.2	0.0786434			803.2	0.0852607				803.2	0.0370729				803.2	0.0381841				803.2	0.0679689
	803.9	0.0791721			803.9	0.0852276				803.9	0.0365923				803.9	0.0370753				803.9	0.0678917
	804.6	0.079463			804.6	0.0859462				804.6	0.0383043				804.6	0.0380953				804.6	0.0690195
	805.4	0.0792046			805.4	0.08421				805.4	0.0366712				805.4	0.0357242				805.4	0.06603
	806.1	0.0799552			806.1	0.0850502				806.1	0.0361589				806.1	0.0365014				806.1	0.0665943
	806.8	0.079507			806.8	0.0850444				806.8	0.0359892				806.8	0.0358786				806.8	0.0655507
	807.5	0.0798947			807.5	0.086333				807.5	0.0367028				807.5	0.0362511				807.5	0.066355
	808.2	0.0794896			808.2	0.0865858				808.2	0.0366662				808.2	0.0360642				808.2	0.0666342
	809	0.0798104			809	0.0869083				809	0.0352015				809	0.0353933				809	0.0665688
	809.7	0.0794914			809.7	0.0869727				809.7	0.0348916				809.7	0.0354926				809.7	0.0670975
	810.4	0.080057			810.4	0.0861163				810.4	0.0333199				810.4	0.0333129				810.4	0.0647408
	811.1	0.0801032			811.1	0.0868786				811.1	0.0339478				811.1	0.0341522				811.1	0.0663595
	811.9	0.0801548			811.9	0.0859169				811.9	0.0324093				811.9	0.0327946				811.9	0.0644848
	812.6	0.0798454			812.6	0.0875823				812.6	0.0334199				812.6	0.0344049				812.6	0.0669397
	813.3	0.0793802			813.3	0.0869207				813.3	0.0322614				813.3	0.0326587				813.3	0.0650203
	814	0.0794641			814	0.0885919				814	0.0338335				814	0.0338094				814	0.0672133
	814.7	0.0800964			814.7	0.0875957				814.7	0.0329644				814.7	0.0321459				814.7	0.0648056
	815.5	0.0811132			815.5	0.0889755				815.5	0.0343277				815.5	0.0338262				815.5	0.066625
	816.2	0.0810002			816.2	0.0883737				816.2	0.0334378				816.2	0.0329682				816.2	0.0648435
	816.9	0.0813235			816.9	0.0892763				816.9	0.0331716				816.9	0.0331837				816.9	0.0654154
	817.6	0.0814066			817.6	0.0898399				817.6	0.0329737				817.6	0.0331374				817.6	0.065199
	818.4	0.0814734			818.4	0.0908656				818.4	0.0335874				818.4	0.0338304				818.4	0.0656021
	819.1	0.0806831			819.1	0.0907405				819.1	0.0338442				819.1	0.0339122				819.1	0.0655185
	819.8	0.0813968			819.8	0.0904609				819.8	0.0322677				819.8	0.0326518				819.8	0.0638746
	820.5	0.0818915			820.5	0.0915579				820.5	0.0333921				820.5	0.0341012				820.5	0.0655265
	821.3	0.0819007			821.3	0.091022				821.3	0.0327497				821.3	0.0330607				821.3	0.0642168
	822	0.0816332			822	0.0921063				822	0.0339495				822	0.0338589				822	0.0655847
	822.7	0.0812815			822.7	0.0921366				822.7	0.0330487				822.7	0.0326809				822.7	0.0645909
	823.4	0.081323			823.4	0.0928053				823.4	0.0339104				823.4	0.0337235				823.4	0.065735
	824.1	0.0814813			824.1	0.0925315				824.1	0.0331019				824.1	0.0329905				824.1	0.0645855
	824.9	0.0820859			824.9	0.0933608				824.9	0.03325				824.9	0.0329952				824.9	0.0651296
	825.6	0.0823134			825.6	0.0943051				825.6	0.0338969				825.6	0.0335797				825.6	0.0654398
	826.3	0.0814029			826.3	0.0937587				826.3	0.0335464				826.3	0.0328338				826.3	0.0643375
	827	0.0817654			827	0.0949127				827	0.0343582				827	0.03415				827	0.0652966
	827.8	0.0816546			827.8	0.0954875				827.8	0.0332063				827.8	0.0332223				827.8	0.0648049
	828.5	0.0823546			828.5	0.0968107				828.5	0.0343458				828.5	0.0344718				828.5	0.0660873
	829.2	0.0825477			829.2	0.0947177				829.2	0.0321287				829.2	0.0320164				829.2	0.0628445
	829.9	0.0831548			829.9	0.0962566				829.9	0.0337522				829.9	0.033524				829.9	0.0642438
	830.6	0.0830323			830.6	0.095451				830.6	0.0329387				830.6	0.0324121				830.6	0.0630755
	831.4	0.083335			831.4	0.0971786				831.4	0.0343858				831.4	0.0339249				831.4	0.0650935
	832.1	0.0832249			832.1	0.0967843				832.1	0.0335606				832.1	0.0334764				832.1	0.0639027
	832.8	0.083655			832.8	0.0980546				832.8	0.0343517				832.8	0.0339118				832.8	0.0653406
	833.5	0.0834646			833.5	0.0972046				833.5	0.0333368				833.5	0.0324713				833.5	0.0637724
	834.2	0.0844448			834.2	0.0978389				834.2	0.0333038				834.2	0.0322789				834.2	0.0646163
	834.9	0.0846843			834.9	0.0988751				834.9	0.034095				834.9	0.0337228				834.9	0.0659632
	835.6	0.0851299			835.6	0.0988836				835.6	0.0342329				835.6	0.0340098				835.6	0.0661205
	836.3	0.085039			836.3	0.0988557				836.3	0.0345503				836.3	0.0340595				836.3	0.0666435
	837	0.0851307			837	0.0985451				837	0.0337387				837	0.0321456				837	0.0650358
	837.7	0.0847246			837.7	0.0997107				837.7	0.0346979				837.7	0.0324686				837.7	0.0666417
	838.3	0.0849934			838.3	0.0982278				838.3	0.0335437				838.3	0.0315277				838.3	0.0649902
	839	0.0859032			839	0.0994129				839	0.0336882				839	0.0325635				839	0.065696
	839.7	0.0865371			839.7	0.0998972				839.7	0.0337237				839.7	0.0333447				839.7	0.0657965
	840.4	0.0869158			840.4	0.100029				840.4	0.0336829				840.4	0.0332272				840.4	0.0660167
	841.1	0.0868572			841.1	0.100093				841.1	0.0338036				841.1	0.0337937				841.1	0.0673418
	841.8	0.0863341			841.8	0.100435				841.8	0.0332668				841.8	0.0333973				841.8	0.067311
	842.5	0.0862327			842.5	0.101587				842.5	0.0340273				842.5	0.0342425				842.5	0.0682946
	843.2	0.086838			843.2	0.100103				843.2	0.0325622				843.2	0.0321334				843.2	0.0664083
	843.9	0.0884326			843.9	0.101727				843.9	0.0332992				843.9	0.033522				843.9	0.0682197
	844.6	0.0880687			844.6	0.101616				844.6	0.0329954				844.6	0.032968				844.6	0.0673021
	845.3	0.0875322			845.3	0.102239				845.3	0.0337789				845.3	0.0342028				845.3	0.0683548
	846	0.0866409			846	0.100257				846	0.0324962				846	0.0322705				846	0.0659305
	846.7	0.0874291			846.7	0.10198				846.7	0.0336542				846.7	0.0329143				846.7	0.0676021
	847.4	0.0876383			847.4	0.101721				847.4	0.0335435				847.4	0.0323158				847.4	0.0669232
	848.1	0.0887602			848.1	0.101648				848.1	0.0331532				848.1	0.0316566				848.1	0.0673254
	848.8	0.0897285			848.8	0.102261				848.8	0.0334705				848.8	0.0328959				848.8	0.0685011
	849.5	0.0905534			849.5	0.102796				849.5	0.0338162				849.5	0.0334721				849.5	0.0687596
	850.2	0.0902573			850.2	0.103777				850.2	0.034782				850.2	0.0344593				850.2	0.0696536
	850.8	0.090714			850.8	0.102343				850.8	0.0333352				850.8	0.0325255				850.8	0.0680595
	851.5	0.0909034			851.5	0.103611				851.5	0.0336336				851.5	0.0336238				851.5	0.0696283
	852.2	0.0911225			852.2	0.103202				852.2	0.0339744				852.2	0.0331897				852.2	0.0695139
	852.9	0.0908532			852.9	0.103197				852.9	0.0342382				852.9	0.0335212				852.9	0.0700167
	853.6	0.0912541			853.6	0.103677				853.6	0.0347521				853.6	0.0335754				853.6	0.069962
	854.3	0.0906947			854.3	0.103524				854.3	0.0339756				854.3	0.0333965				854.3	0.0699228
	855	0.0912756			855	0.10418				855	0.0345722				855	0.0340835				855	0.0712699
	855.7	0.0915976			855.7	0.103245				855.7	0.0339096				855.7	0.032747				855.7	0.0708806
	856.4	0.0939073			856.4	0.105367				856.4	0.03533				856.4	0.0345154				856.4	0.0730072
	857.1	0.0934526			857.1	0.10397				857.1	0.0340434				857.1	0.032233				857.1	0.0712156
	857.8	0.0936728			857.8	0.104848				857.8	0.0337981				857.8	0.0321169				857.8	0.0725132
	858.5	0.0925734			858.5	0.104815				858.5	0.033256				858.5	0.031575				858.5	0.0720279
	859.2	0.0930387			859.2	0.106697				859.2	0.034783				859.2	0.0340896				859.2	0.074402
	859.9	0.0930926			859.9	0.105278				859.9	0.0358415				859.9	0.034179				859.9	0.0744366
	860.6	0.0939762			860.6	0.104331				860.6	0.0355636				860.6	0.0337794				860.6	0.0745052
	861.3	0.0949649			861.3	0.104907				861.3	0.0368276				861.3	0.0342196				861.3	0.0756739
	862	0.0955371			862	0.105779				862	0.0372012				862	0.0351116				862	0.0758796
	862.7	0.0963924			862.7	0.106634				862.7	0.0382047				862.7	0.0360364				862.7	0.0774751
	863.3	0.0964364			863.3	0.106762				863.3	0.0371764				863.3	0.0351231				863.3	0.0769163
	864	0.096238			864	0.107777				864	0.0372255				864	0.035683				864	0.0782404
	864.7	0.0962074			864.7	0.106848				864.7	0.0375145				864.7	0.0351023				864.7	0.0779489
	865.4	0.096507			865.4	0.106379				865.4	0.0368061				865.4	0.0352225				865.4	0.0781481
	866.1	0.0973844			866.1	0.107484				866.1	0.0377004				866.1	0.0367167				866.1	0.0793594
	866.8	0.0975056			866.8	0.10866				866.8	0.0382747				866.8	0.0377935				866.8	0.0803894
	867.5	0.0980236			867.5	0.108942				867.5	0.0398376				867.5	0.0386126				867.5	0.0816878
	868.2	0.098934			868.2	0.10826				868.2	0.0390711				868.2	0.036755				868.2	0.0813553
	868.9	0.0996227			868.9	0.109363				868.9	0.0396403				868.9	0.0374601				868.9	0.0828505
	869.6	0.0998061			869.6	0.109377				869.6	0.0396373				869.6	0.038109				869.6	0.0838879
	870.3	0.0998178			870.3	0.109189				870.3	0.0404275				870.3	0.0394867				870.3	0.0858459
	871	0.10056			871	0.109202				871	0.0406086				871	0.0392109				871	0.0860115
	871.7	0.101871			871.7	0.110512				871.7	0.0412617				871.7	0.0399607				871.7	0.0865491
	872.4	0.102575			872.4	0.110814				872.4	0.0414723				872.4	0.0402763				872.4	0.0866492
	873.1	0.102762			873.1	0.110232				873.1	0.0411384				873.1	0.0402212				873.1	0.0870153
	873.8	0.102834			873.8	0.111123				873.8	0.0419953				873.8	0.0411573				873.8	0.0890037
	874.5	0.10319			874.5	0.111395				874.5	0.0426378				874.5	0.0411511				874.5	0.0897898
	875.2	0.103432			875.2	0.111676				875.2	0.0434109				875.2	0.0419458				875.2	0.0913853
	875.8	0.103844			875.8	0.111418				875.8	0.0431698				875.8	0.0415641				875.8	0.0915479
	876.5	0.104598			876.5	0.112511				876.5	0.0440339				876.5	0.0422932				876.5	0.0931489
	877.2	0.105707			877.2	0.112439				877.2	0.0443437				877.2	0.0423025				877.2	0.0943229
	877.9	0.106046			877.9	0.111777				877.9	0.0443598				877.9	0.0424414				877.9	0.0951396
	878.6	0.107559			878.6	0.112284				878.6	0.0447046				878.6	0.0431677				878.6	0.096771
	879.3	0.108074			879.3	0.113117				879.3	0.0452272				879.3	0.0440411				879.3	0.0976257
	880	0.109543			880	0.113966				880	0.0465728				880	0.0449431				880	0.0997488
	880.7	0.109193			880.7	0.112988				880.7	0.0455391				880.7	0.0445905				880.7	0.100243
	881.4	0.109826			881.4	0.114094				881.4	0.0461066				881.4	0.0456298				881.4	0.100994
	882.1	0.109535			882.1	0.113774				882.1	0.0464515				882.1	0.0458384				882.1	0.101438
	882.8	0.109853			882.8	0.113756				882.8	0.0479462				882.8	0.0472027				882.8	0.1024
	883.5	0.11062			883.5	0.113587				883.5	0.0479754				883.5	0.0479698				883.5	0.103916
	884.2	0.110867			884.2	0.114854				884.2	0.0486114				884.2	0.048515				884.2	0.104365
	884.9	0.112112			884.9	0.115807				884.9	0.0497457				884.9	0.0490237				884.9	0.10569
	885.6	0.112994			885.6	0.115291				885.6	0.0503651				885.6	0.0488821				885.6	0.106987
	886.3	0.113964			886.3	0.116055				886.3	0.0505465				886.3	0.0495057				886.3	0.109341
	887	0.113996			887	0.1163				887	0.0508133				887	0.0501292				887	0.110574
	887.6	0.11385			887.6	0.117475				887.6	0.0516776				887.6	0.0504977				887.6	0.112251
	888.3	0.114899			888.3	0.116699				888.3	0.0522797				888.3	0.0507191				888.3	0.112877
	889	0.115816			889	0.117597				889	0.0520146				889	0.05122				889	0.113975
	889.7	0.11642			889.7	0.117843				889.7	0.0525182				889.7	0.0513844				889.7	0.115119
	890.4	0.117118			890.4	0.118637				890.4	0.0535039				890.4	0.0522428				890.4	0.116845
	891.1	0.117453			891.1	0.118413				891.1	0.0545611				891.1	0.0518314				891.1	0.117408
	891.8	0.118144			891.8	0.118961				891.8	0.0548068				891.8	0.0527403				891.8	0.117632
	892.5	0.118719			892.5	0.119562				892.5	0.0551219				892.5	0.0530751				892.5	0.118688
	893.2	0.118892			893.2	0.119637				893.2	0.0553272				893.2	0.0536108				893.2	0.120854
	893.9	0.11918			893.9	0.119519				893.9	0.0555509				893.9	0.0539439				893.9	0.121966
	894.6	0.119214			894.6	0.119004				894.6	0.0553464				894.6	0.0542645				894.6	0.122129
	895.3	0.119987			895.3	0.119331				895.3	0.0559998				895.3	0.0550228				895.3	0.122686
	896	0.120544			896	0.119195				896	0.0569239				896	0.0553479				896	0.124741
	896.7	0.121153			896.7	0.120056				896.7	0.0574874				896.7	0.0555973				896.7	0.125517
	897.4	0.121657			897.4	0.120944				897.4	0.0579689				897.4	0.0562834				897.4	0.125936
	898.1	0.121224			898.1	0.12097				898.1	0.0577819				898.1	0.0563864				898.1	0.125887
	898.8	0.12147			898.8	0.120974				898.8	0.0581445				898.8	0.0563256				898.8	0.127313
	899.5	0.121257			899.5	0.121202				899.5	0.0571747				899.5	0.0559379				899.5	0.127481
	900.1	0.122007			900.1	0.121607				900.1	0.0571295				900.1	0.0551282				900.1	0.126871
	900.8	0.122968			900.8	0.121883				900.8	0.0575783				900.8	0.0555009				900.8	0.127223
	901.5	0.123929			901.5	0.12062				901.5	0.0582077				901.5	0.0554857				901.5	0.128762
	902.2	0.124472			902.2	0.121092				902.2	0.0586277				902.2	0.0564546				902.2	0.130404
	902.9	0.123291			902.9	0.121353				902.9	0.0582604				902.9	0.0565115				902.9	0.13022
	903.6	0.123514			903.6	0.121803				903.6	0.058557				903.6	0.056479				903.6	0.130875
	904.3	0.124004			904.3	0.12147				904.3	0.0582205				904.3	0.0562048				904.3	0.130774
	905	0.124447			905	0.121641				905	0.0581895				905	0.0559001				905	0.131421
	905.7	0.12372			905.7	0.121772				905.7	0.0580347				905.7	0.0558012				905.7	0.130892
	906.4	0.123856			906.4	0.121755				906.4	0.0592791				906.4	0.0565191				906.4	0.132554
	907.1	0.124833			907.1	0.121053				907.1	0.059049				907.1	0.056622				907.1	0.132812
	907.8	0.12546			907.8	0.121489				907.8	0.0586289				907.8	0.0563248				907.8	0.132744
	908.5	0.125871			908.5	0.122102				908.5	0.0582593				908.5	0.0560223				908.5	0.132983
	909.2	0.125507			909.2	0.122257				909.2	0.0587926				909.2	0.0561991				909.2	0.134184
	909.9	0.126649			909.9	0.123004				909.9	0.059344				909.9	0.0567653				909.9	0.136133
	910.6	0.12623			910.6	0.122951				910.6	0.0588938				910.6	0.0567053				910.6	0.135602
	911.3	0.127224			911.3	0.123108				911.3	0.0592732				911.3	0.0568944				911.3	0.136395
	912	0.127459			912	0.123368				912	0.0603959				912	0.0572486				912	0.137053
	912.6	0.128057			912.6	0.124069				912.6	0.0608563				912.6	0.0574562				912.6	0.138228
	913.3	0.128056			913.3	0.124971				913.3	0.0611324				913.3	0.057815				913.3	0.13813
	914	0.127561			914	0.124954				914	0.0615098				914	0.0587285				914	0.138694
	914.7	0.12928			914.7	0.125419				914.7	0.0627384				914.7	0.0598127				914.7	0.140388
	915.4	0.12947			915.4	0.125212				915.4	0.0627162				915.4	0.0599713				915.4	0.141483
	916.1	0.130209			916.1	0.126293				916.1	0.0631149				916.1	0.0602598				916.1	0.142434
	916.8	0.128983			916.8	0.125937				916.8	0.0632867				916.8	0.060781				916.8	0.141761
	917.5	0.12929			917.5	0.126907				917.5	0.0642793				917.5	0.0619399				917.5	0.143303
	918.2	0.129023			918.2	0.12647				918.2	0.0643345				918.2	0.0619002				918.2	0.14337
	918.9	0.12897			918.9	0.126997				918.9	0.064631				918.9	0.0620347				918.9	0.144494
	919.6	0.129414			919.6	0.127284				919.6	0.0653451				919.6	0.0624603				919.6	0.145588
	920.3	0.129658			920.3	0.1271				920.3	0.0660774				920.3	0.0628361				920.3	0.146505
	921	0.130378			921	0.127419				921	0.0659357				921	0.0627545				921	0.146839
	921.7	0.129422			921.7	0.127523				921.7	0.0656568				921.7	0.0620166				921.7	0.145384
	922.4	0.130056			922.4	0.128295				922.4	0.0659862				922.4	0.062925				922.4	0.146254
	923.1	0.129465			923.1	0.128056				923.1	0.0664935				923.1	0.0638688				923.1	0.14699
	923.8	0.129508			923.8	0.128156				923.8	0.0664527				923.8	0.0647874				923.8	0.148258
	924.5	0.128921			924.5	0.127629				924.5	0.0656198				924.5	0.0639667				924.5	0.146597
	925.1	0.129391			925.1	0.127759				925.1	0.0658657				925.1	0.0632113				925.1	0.146442
	925.8	0.129831			925.8	0.126956				925.8	0.0661152				925.8	0.0622364				925.8	0.145723
	926.5	0.129245			926.5	0.127134				926.5	0.0658411				926.5	0.0619525				926.5	0.146404
	927.2	0.127665			927.2	0.127415				927.2	0.0648217				927.2	0.0607057				927.2	0.144588
	927.9	0.126572			927.9	0.127157				927.9	0.0633661				927.9	0.0604309				927.9	0.143439
	928.6	0.127327			928.6	0.12612				928.6	0.063153				928.6	0.0597264				928.6	0.143432
	929.3	0.128438			929.3	0.125973				929.3	0.0627031				929.3	0.0597864				929.3	0.14415
	930	0.128876			930	0.125883				930	0.0623982				930	0.0587894				930	0.143851
	930.7	0.126817			930.7	0.125821				930.7	0.0611941				930.7	0.0573662				930.7	0.141308
	931.4	0.126724			931.4	0.124881				931.4	0.0608029				931.4	0.0567263				931.4	0.140741
	932.1	0.125985			932.1	0.12415				932.1	0.0591612				932.1	0.0557401				932.1	0.139967
	932.8	0.126333			932.8	0.123684				932.8	0.05799				932.8	0.0546043				932.8	0.137744
	933.5	0.125675			933.5	0.12292				933.5	0.0568414				933.5	0.0526248				933.5	0.135033
	934.2	0.125321			934.2	0.121951				934.2	0.0563801				934.2	0.050627				934.2	0.132398
	934.9	0.12558			934.9	0.121693				934.9	0.0554074				934.9	0.0496044				934.9	0.131902
	935.6	0.124411			935.6	0.120783				935.6	0.0532146				935.6	0.0474648				935.6	0.129474
	936.3	0.124258			936.3	0.120291				936.3	0.0518452				936.3	0.0463186				936.3	0.128307
	937	0.123587			937	0.11848				937	0.0504888				937	0.0442971				937	0.126248
	937.6	0.123575			937.6	0.118073				937.6	0.0486794				937.6	0.0431894				937.6	0.12425
	938.3	0.123159			938.3	0.117256				938.3	0.0464931				938.3	0.0406099				938.3	0.120334
	939	0.12293			939	0.116955				939	0.0448619				939	0.0385459				939	0.117737
	939.8	0.123163			939.8	0.114894				939.8	0.0438147				939.8	0.0369095				939.8	0.11602
	940.4	0.122391			940.4	0.113428				940.4	0.0417722				940.4	0.0353068				940.4	0.114448
	941.1	0.121097			941.1	0.112848				941.1	0.0399321				941.1	0.0339361				941.1	0.112107
	941.8	0.119749			941.8	0.112388				941.8	0.0374022				941.8	0.030993				941.8	0.108121
	942.5	0.119848			942.5	0.111832				942.5	0.0365491				942.5	0.0288831				942.5	0.105717
	943.2	0.119893			943.2	0.110238				943.2	0.034471				943.2	0.0265741				943.2	0.102666
	943.9	0.119444			943.9	0.110506				943.9	0.0330155				943.9	0.0253634				943.9	0.101702
	944.6	0.11877			944.6	0.11073				944.6	0.0313199				944.6	0.0241373				944.6	0.0988194
	945.3	0.11933			945.3	0.110396				945.3	0.0298096				945.3	0.0222126				945.3	0.0973918
	946	0.120447			946	0.10862				946	0.0287806				946	0.0213097				946	0.0947313
	946.7	0.120573			946.7	0.107788				946.7	0.0271312				946.7	0.019265				946.7	0.0931421
	947.4	0.119636			947.4	0.107679				947.4	0.0253669				947.4	0.0177786				947.4	0.0902692
	948.1	0.118704			948.1	0.106748				948.1	0.0233787				948.1	0.0139394				948.1	0.0874077
	948.8	0.119674			948.8	0.104855				948.8	0.0219939				948.8	0.0121399				948.8	0.0848197
	949.5	0.12024			949.5	0.103131				949.5	0.0213396				949.5	0.0103173				949.5	0.0832866

## Sheet: Cu LPR Myo Data for MMRT
Cu ion		LPR		Myo
Temp (K)	Ln Kcat	Temp (K)	Ln Kcat	Temp (K)	Ln Kcat
335.15	-9.1472	293.15	7.707	296.15	5.2477
333.15	-9.3618	295.15	7.7901	299.15	4.9632
327.15	-9.2802	299.15	8.0678	301.15	5.3052
331.15	-9.4218	301.15	8.1867	303.15	4.712
333.15	-8.727	303.15	8.3161	305.15	4.2882
337.15	-9.1044	305.15	8.2707	305.15	4.6385
327.15	-9.3127	305.15	8.2867	305.15	5.0136
327.15	-9.2802	315.15	8.6093	305.15	4.7209
337.15	-9.1547	307.15	8.5598	307.15	4.7658
335.15	-9.0688	310.15	8.608	309.15	3.8245
333.15	-9.5392	312.15	8.4495	309.15	3.4485
333.15	-9.3353	313.15	8.5611	293.15	5.4579
331.15	-9.5174	311.15	8.6629	291.15	5.1695
329.15	-9.2773	297.15	8.085	289.15	5.6008
327.15	-9.6273	317.15	8.7926	293.15	5.2087
325.15	-9.5144	319.15	8.6947	291.15	5.3763
323.15	-9.2426	321.15	8.7131	308.15	3.2329
323.15	-9.3419	323.15	8.5637	293.15	5.2047
321.15	-9.2451	325.15	8.5109	293.15	5.1802
321.15	-9.3911	323.15	8.6088	288.15	4.9727
319.15	-9.3754	317.15	8.5374	283.15	4.724
319.15	-9.1681	315.15	8.6911	278.15	4.1209
319.15	-9.3754	321.15	8.6809	276.15	4.3962
317.15	-9.4639	319.15	8.5316	276.15	4.0283
317.15	-9.5497	325.15	8.5485
317.15	-9.2106	333.15	8.3609
317.15	-9.1487
317.15	-9.634
315.15	-9.5285
315.15	-9.4596
313.15	-9.4036
311.15	-9.7906
309.15	-9.9505
307.15	-10.081
305.15	-10.037
303.15	-10.237
303.15	-10.342
301.15	-10.336
299.15	-10.357
298.15	-10.348
298.15	-10.578
295.15	-10.408
293.15	-10.819
325.15	-9.2883
325.15	-9.0962
329.15	-9.0633
313.15	-9.4245
313.15	-9.4802
331.15	-9.1827
333.15	-9.0598
335.15	-9.0928
337.15	-9.2844
335.15	-9.3193
